---

1  
2 **Myogenic Vasoconstriction Requires Canonical G<sub>q/11</sub> Signaling of the**  
3 **Angiotensin II Type 1a Receptor in the Murine Vasculature**

4  
5 Yingqiu Cui<sup>1</sup>, Mario Kassmann<sup>1</sup>, Sophie Nickel<sup>1</sup>, Chenglin Zhang<sup>2</sup>, Natalia Alenina<sup>3,4</sup>, Yoland  
6 Marie Anistan<sup>1</sup>, Johanna Schleifenbaum<sup>1</sup>, Michael Bader<sup>3,4,5,6</sup>, Donald G. Welsh<sup>7</sup>, Yu Huang<sup>2</sup>,  
7 Maik Gollasch<sup>1,8,9</sup>

- 8  
9 1. Charité - Universitätsmedizin Berlin, Experimental and Clinical Research Center  
10 (ECRC), a joint cooperation between the Charité Medical Faculty and the Max  
11 Delbrück Center for Molecular Medicine (MDC), Lindenberger Weg 80, 13125 Berlin,  
12 Germany,  
13 2. Heart and Vascular Institute and School of Biomedical Sciences, Chinese University  
14 of Hong Kong, Hong Kong, China,  
15 3. Max Delbrück Center for Molecular Medicine, Berlin, Germany,  
16 4. DZHK (German Center for Cardiovascular Research), Partner Site Berlin, Berlin,  
17 Germany.  
18 5. Charité – Universitätsmedizin Berlin, Germany.  
19 6. Institute for Biology, University of Lübeck, Lübeck, Germany.  
20 7. Robarts, Research Institute, Department of Physiology and Pharmacology, Western  
21 University, London, ON, Canada,  
22 8. Charité - Universitätsmedizin Berlin, Medical Clinic for Nephrology and Internal  
23 Intensive Care, Campus Virchow, 13353 Berlin, Germany,  
24 9. Department of Internal Medicine and Geriatrics, University Medicine Greifswald,  
25 Greifswald, Germany

26 **Corresponding author:** Maik Gollasch, Experimental and Clinical Research Center (ECRC),  
27 13125 Berlin Germany. E-mail: [maik.gollasch@charite.de](mailto:maik.gollasch@charite.de)

28 **Key Words:** Angiotensin II type 1a receptor, biased ligands, myogenic vasoconstriction,  
29 arterial smooth muscle

---

## 31 Abstract

32 **Background:** The myogenic response is an inherent vasoconstrictive property of resistance  
33 arteries to keep blood flow constant in response to increases in intravascular pressure.  
34 Angiotensin II (Ang II) type 1 receptors (AT1R) are broadly distributed, mechanoactivated  
35 receptors, which have been proposed to transduce myogenic vasoconstriction. However, the  
36 AT1R subtype(s) involved and their downstream G protein- and  $\beta$ -arrestin-mediated signaling  
37 pathways are still elusive. **Objective:** To characterize the function of AT1aR and AT1bR in  
38 the regulation of the myogenic response of resistance size arteries and possible downstream  
39 signaling cascades mediated by  $G_{q/11}$  and/or  $\beta$ -arrestins. **Methods:** We used *Agtr1a*<sup>-/-</sup>,  
40 *Agtr1b*<sup>-/-</sup> and tamoxifen-inducible smooth muscle-specific AT1aR knockout mice (SM-*Agtr1a*  
41 mice). FR900359, [Sar1, Ile4, Ile8] Ang II (SII) and TRV120055 were used as selective  $G_{q/11}$   
42 protein inhibitor and biased agonists to activate non-canonical  $\beta$ -arrestin and canonical  $G_{q/11}$   
43 signaling of the AT1R, respectively. **Results:** Myogenic and Ang II-induced vasoconstrictions  
44 were diminished in the perfused renal vasculature of *Agtr1a*<sup>-/-</sup> and SM-*Agtr1a* mice. Similar  
45 results were observed in isolated pressurized mesenteric and cerebral arteries. Myogenic  
46 tone and Ang II- induced vasoconstrictions were normal in arteries from *Agtr1b*<sup>-/-</sup> mice. The  
47  $G_{q/11}$  blocker FR900359 decreased myogenic tone and Ang II vasoconstrictions while  
48 selective biased targeting of AT1R  $\beta$ -arrestin signaling pathways had no effects. **Conclusion:**  
49 The present study demonstrates that myogenic arterial constriction requires  $G_{q/11}$ -dependent  
50 signaling pathways of mechanoactivated AT1aR but not G protein-independent, noncanonical  
51 alternative signaling pathways in the murine mesenteric, cerebral and renal circulation.

## 52 1. Introduction

53 Myogenic vasoconstriction reflects the inherent ability of resistance arteries to adapt their  
54 diameter in response to alterations of intraluminal pressure. This response was first described  
55 by William Bayliss (2) and it reflects changes to the contractile state of vascular smooth  
56 muscle. Increases in transmural pressure cause vasoconstriction whereas decreases  
57 produce the opposing effect; this prototype of autoregulation has been observed in various  
58 microvascular arterial beds (8) and it is responsible for maintaining constant blood flow during  
59 fluctuations in perfusion pressure. Many cardiovascular disorders are associated with  
60 dysfunctional arterial myogenic response and they include hypertension, chronic heart failure,  
61 ischemic stroke, diabetes mellitus (6) (14) (31) (41) (45). Despite the functional importance of  
62 the myogenic response, the molecular mechanisms responsible for sensing intraluminal  
63 pressure has yet to be fully clarified.

64 Myogenic vasoconstriction is mediated by pressure-dependent depolarization of vascular  
65 smooth muscle cells, an event that augments  $\text{Ca}^{2+}$  influx through voltage-dependent  $\text{Ca}_v1.2$   
66 channels (39) (7) (9) (16) (17) (38).  $\text{G}_{q/11}$ -coupled receptors (GPCRs) are thought to function  
67 as the upstream sensor of membrane stretch (37), with angiotensin II type 1a ( $\text{AT}_{1a}\text{R}$ ), and  
68 perhaps  $\text{AT}_{1b}\text{R}$  receptors in concert with cysteinyl leukotriene 1 receptor ( $\text{CysLT}_1\text{R}$ ), playing  
69 a particularly important role in the mesenteric and renal circulation (3) (40) (46) (49).  $\text{AT}_1\text{Rs}$   
70 are known to couple primarily to classical  $\text{G}_{q/11}$  proteins to activate multiple downstream  
71 signals, including protein kinase (PKC), extracellular signal-regulated kinases (ERK1/2), Raf  
72 kinases, tyrosine kinases, receptor tyrosine kinases (EGFR, PDGF, insulin receptor) and  
73 reactive oxygen species (ROS) (1). The  $\text{AT}_1\text{R}$  activation also stimulates G  
74 protein-independent signaling pathways such as  $\beta$ -arrestin-mediated mitogen-activated  
75 protein kinase (MAPK) activation and Src-JAK/STAT (1). Recently, it has been shown that the  
76 activation of intracellular signaling by mechanical stretch of the  $\text{AT}_1\text{R}$  does not require the  
77 natural ligand angiotensin II (Ang II) (44) (55) (46) but requires the activation of the transducer  
78  $\beta$ -arrestin (44). Interestingly, mechanical stretch appears to allosterically stabilize specific  
79  $\beta$ -arrestin-biased active conformations of  $\text{AT}_1\text{R}$  to promote noncanonical downstream  
80 signaling mediated exclusively by the multifunctional scaffold protein,  $\beta$ -arrestin (50).  
81 Whether this noncanonical  $\beta$ -arrestin effector pathway plays a role in myogenic and  
82 ligand-dependent vasoconstriction has yet to be ascertained.

83 This study explored the specific function of  $\text{AT}_1\text{R}$  subtypes in the regulation of myogenic  
84 tone and whether downstream signaling pathways are dependent on canonical  $\text{G}_{q/11}$  and/or  
85 noncanonical alternative signaling pathways. In this regard, we generated mice with cell  
86 specific deletion of smooth muscle  $\text{AT}_{1a}$  receptors (*SM-Agtr1a* mice) and studied the effects  
87 of biased GPCR agonists and  $\text{G}_{q/11}$  protein inhibition on tone development in three distinct  
88 vascular beds (renal, cerebral and mesenteric circulation). We found that the  $\text{AT}_{1a}\text{R}$  coupled  
89 towards the canonical  $\text{G}_{q/11}$  signaling pathway is required for the myogenic response in all  
90 three vascular beds. Our data argue against involvement of noncanonical G  
91 protein-independent alternative signaling downstream of the  $\text{AT}_{1a}\text{R}$  to cause myogenic  
92 vasoconstriction.

## 93 **2. Materials and Methods**

### 94 **2.1 Mouse Model**

95 We used the SMMHC-Cre-ER<sup>T2</sup> transgenic mouse line expressing Cre recombinase in  
96 smooth muscle cells under control of the smooth muscle myosin heavy chain promoter (26)

97 and a mouse line bearing a floxed allele of the *Agtr1a* gene (*Agtr1a<sup>flox</sup>*), encoding the major  
98 murine AT1 receptor isoform (AT1aR) (48) to generate SMMHC-Cre+*Agtr1a<sup>flox/flox</sup>*  
99 (SM-*Agtr1a<sup>-/-</sup>*) mice (**Figure 1A**). Genotyping was performed by polymerase chain reaction  
100 (PCR) analysis of tail DNA as described previously (26). Amplification of the SMMHC-Cre  
101 gene was performed in a multiplex PCR with the primers TGA CCC CAT CTC TTC ACT CC  
102 (SMWT1), AAC TCC ACG ACC ACC TCA TC (SMWT2), and AGT CCC TCA CAT CCT CAG  
103 GTT (phCREAS1) (13). The following primers (5'-3') were used to identify *Agtr1a<sup>flox</sup>* alleles:  
104 forward GCT TTC TCT GTT ATG CAG TCT, reverse ATC AGC ACA TCC AGG AAT G. Adult  
105 (12-16 weeks) male mice were injected with tamoxifen (30 µg/mg body weight) on 5  
106 consecutive days. Isolated arteries were usually obtained after 2 to 3 days after tamoxifen  
107 treatment. **Figure 1B** shows reduction of AT1aR expression in vascular smooth muscle cells  
108 of SM-*Agtr1a<sup>-/-</sup>* arteries. We also studied adult (12-16 weeks) male mice with global AT1a  
109 receptor deficiency (*Agtr1a<sup>-/-</sup>*) (24) (46) (25), and with global AT1b receptor deficiency  
110 (*Agtr1b<sup>-/-</sup>*) (40). Age-matched male mice were used as controls in the experiments. Animal  
111 care followed American Physiological Society guidelines, and all protocols were approved by  
112 local authority (LAGeSo, Berlin, Germany) and the animal welfare officers of the Max  
113 Delbrück Center for Molecular Medicine. Mice were maintained in the Max Delbrück Center  
114 animal facility in individually ventilated cages (Tecniplast, Deutschland) under standardized  
115 conditions with an artificial 12-hour dark-light cycle, with free access to standard chow (0.25%  
116 sodium; SSNIFF Spezialitäten, Soest, Germany) and drinking water. Animals were randomly  
117 assigned to the experimental procedures.

## 118 **2.2 Materials**

119 Antibody to  $\alpha$ -smooth muscle actin ( $\alpha$ -SMA, #ab8211) was from Abcam (Cambridge, MA,  
120 USA). Anti-AT1R (#PA5-20812) and donkey anti-rabbit IgG (H+L) secondary antibody  
121 (A10040) were purchased from Thermo Fisher Scientific (Waltham, MA, USA).  
122 4',6-diamidino-2-phenylindole (DAPI, #D9542) was purchased from Sigma-Aldrich Co. (St.  
123 Louis, MO, USA). Ang II (#A9525), SII (#sc-391239A) and tamoxifen (#H7904) were from  
124 Sigma-Aldrich Co (82024 Taufkirchen, Germany). TRV120055 (#JT-71995) and TRV120056  
125 (#JT-71996) were from Synpeptide Co., Ltd (Shanghai, China).

## 126 **2.3 Mesenteric and cerebral arteries**

127 After mice were killed, the mesenteric bed and brain were removed and placed into cold (4°C),  
128 gassed (95% O<sub>2</sub>-5% CO<sub>2</sub>) physiological saline solution (PSS) of the following composition  
129 (mmol/L): 119 NaCl, 4.7 KCl, 25 NaHCO<sub>3</sub>, 1.2 KH<sub>2</sub>PO<sub>4</sub>, 1.6 CaCl<sub>2</sub>, 1.2 MgSO<sub>4</sub>, 0.03 EDTA,

---

130 and 11.1 glucose. Third or fourth order mesenteric and middle cerebral arteries or posterior  
131 cerebral arteries were dissected and cleaned of adventitial connective tissue (46) (18) (10)  
132 (11).

#### 133 **2.4 Pressure myography**

134 Vessel myography was performed as previously described (26) (37) (46) (10). Mesenteric or  
135 cerebral arteries were mounted on glass cannula and superfused continuously with PSS (95%  
136 O<sub>2</sub>-5% CO<sub>2</sub>; pH, 7.4; 37°C). The vessels were stepwise pressurized to 20, 40, 60, 80, or 100  
137 mmHg using a pressure servo control system (Living System Instrumentation, Burlington, VT).  
138 We measured the inner diameter of the vessels with a video microscope (Nikon Diaphot,  
139 Düsseldorf, Germany) connected to a personal computer for data acquisition and analysis  
140 (HaSoTec, Rostock, Germany) (18) (19) (46) (11) (10). Arteries were equilibrated for 45 to 60  
141 minutes before starting experiments. A 60-mmol/L KCl challenge was performed before any  
142 other intervention.

#### 143 **2.5 Analysis of myogenic tone in isolated perfused kidneys**

144 Isolated kidneys were perfused in an organ chamber using a peristaltic pump at constant flow  
145 (0.3-1.9 ml/min) of oxygenated (95% O<sub>2</sub> and 5% CO<sub>2</sub>) PSS (46). Drugs (Ang II or biased  
146 agonists) were added to the perfusate. Perfusion pressure was measured by a pressure  
147 transducer after an equilibration period of 60-90 min. Data were recorded and analyzed by a  
148 Powerlab acquisition system (AD Instruments, Colorado Springs). Ang II-induced pressor  
149 effects were normalized to the maximal pressor effect induced by KCl (60 mmol/L) (37) (46)  
150 (18).

#### 151 **2.6 Immunofluorescence**

152 *Agtr1a*<sup>+/+</sup> and *SM-Agtr1a*<sup>-/-</sup> mice mesenteric arteries were dissected and further fixed in 4%  
153 formaldehyde and embedded in Tissue-Tek O.C.T. compound to be frozen in liquid nitrogen.  
154 Tissues were then sectioned and permeabilized in 1% Triton X-100 in PBS. Sections were  
155 stained with the primary antibody overnight at 4°C. After washing with PBS for 3×5 min, the  
156 secondary antibody and DAPI were applied for 2 hours at room temperature. Fluorescence  
157 images were captured by use of Olympus FV1000 confocal microscopy and images were  
158 analyzed by ImageJ analysis software.

#### 159 **2.7 Statistics**

160 Data are presented as means ± SEM. Statistically significant differences in mean values were  
161 determined by Student's unpaired t test or one-way analysis of variance (ANOVA). P values <  
162 0.05 were considered statistically significant.

163

### 164 **3. Results**

#### 165 **3.1 AT1aR is essential for pressure-induced response in the renal circulation**

166 We evaluated myogenic tone in mouse renal circulation, a highly myogenic bed regulating  
167 blood flow to the kidneys and consequently sodium excretion and systemic blood pressure.  
168 Renal vascular resistance of isolated perfused kidneys was determined by measuring  
169 perfusion pressure at fixed levels of flow. The perfusion pressure increased with flow rate in  
170 kidneys of wild-type *Agtr1a*<sup>+/+</sup> mice, reaching a value of about 160 mmHg at a flow rate of 1.9  
171 ml/min (**Figure 2A**). Kidneys from *Agtr1a*<sup>-/-</sup> mice developed significantly less pressure at the  
172 same flow rate (**Figure 2B, E**). 60 mmol/L KCl-induced increases in perfusion pressure were  
173 normal in *Agtr1a*<sup>-/-</sup> kidneys (**Figure 2 F**). At a flow rate of 1.9 ml/min, pressure in *Agtr1a*<sup>-/-</sup>  
174 kidneys was ~100 mmHg lower than in *Agtr1a*<sup>+/+</sup> kidneys. Angiotensin II (Ang II, 10 nmol/L)  
175 increased perfusion pressure by ~80 mmHg in kidneys of *Agtr1a*<sup>+/+</sup> mice, but had no effect in  
176 kidneys of *Agtr1a*<sup>-/-</sup> mice (**Figure 2C**); this is indicative of AT1aRs mediating Ang II-dependent  
177 vasoconstriction. Removal of external Ca<sup>2+</sup> nearly abolished flow-induced myogenic  
178 constriction in perfused kidneys of *Agtr1a*<sup>+/+</sup> mice, but had nearly no effect in kidneys of  
179 *Agtr1a*<sup>-/-</sup> mice (**Figure 2D**), indicating AT1aRs mediate also myogenic constriction of mouse  
180 renal arterioles. Of note, there was no difference in myogenic tone and Ang II  
181 vasoconstrictions between *Agtr1b*<sup>-/-</sup> versus *Agtr1b*<sup>+/+</sup> kidneys (**Figure 3**).

182 Next we focused on kidneys from SM-*Agtr1a*<sup>-/-</sup> mice (**Figure 4**). At a flow rate of 1.9 ml/min,  
183 pressure in SM-*Agtr1a*<sup>-/-</sup> kidneys was ~90 mmHg lower than in *Agtr1a*<sup>+/+</sup> kidneys (**Figure 4 A,**  
184 **B, E**). SM-*Agtr1a*<sup>-/-</sup> kidneys showed largely reduced myogenic vasoconstriction as assessed  
185 by exposure of the kidneys to Ca<sup>2+</sup> free PSS (**Figure 4B, D**), whereas wild-type kidneys  
186 showed strong myogenic vasoconstrictions (**Figure 4A, D**). 60 mmol/L KCl-induced increases  
187 in perfusion pressure were normal in *Agtr1a*<sup>-/-</sup> kidneys (**Figure 4F**). Ang II (10 nmol/L) induced  
188 weaker increases in perfusion pressure in kidneys of SM-*Agtr1a*<sup>-/-</sup> mice compared to controls  
189 (**Figure 4D**). Together, these results reveal a key role of AT1aR but not AT1bR in the  
190 flow-induced myogenic response of the mouse renal vasculature.

#### 191 **3.2 AT1aR contribute to myogenic constriction in mesenteric arteries**

192 We monitored myogenic constriction in resistance-sized mesenteric arteries using  
193 videomicroscopy. Mesenteric arteries were exposed to stepwise (20 mmHg) increases in  
194 intraluminal pressure (20-100 mmHg) in the presence and absence of external Ca<sup>2+</sup> (1.6  
195 mmol/L) to determine active and passive vessel diameters, respectively. **Figure 5** shows



196 representative recordings of mesenteric arteries from *Agtr1a*<sup>+/+</sup> mice (**Figure 5A**) and  
197 SM-*Agtr1a*<sup>-/-</sup> mice (**Figure 5B**) and myogenic vasoconstriction was defined as the diameter  
198 difference in the presence and absence of external Ca<sup>2+</sup> (1.6 mmol/L) at each pressure step  
199 (46). Increases in intraluminal pressure generated active tension that counteracted further  
200 dilation of the vessels at 60 to 80 mmHg in mesenteric arteries from *Agtr1a*<sup>+/+</sup> mice, reaching  
201 peak constrictions of 50 μm at 80 to 100 mmHg (**Figure 5A**). In contrast, mesenteric arteries  
202 from SM-*Agtr1a*<sup>-/-</sup> mice only produced ~35% of the constriction observed in wild-type arteries  
203 (**Figure 5B, C**). Ang II strongly constricted arteries from *Agtr1a*<sup>+/+</sup> mice but had no effect on  
204 arteries from SM-*Agtr1a*<sup>-/-</sup> mice (**Figure 5D**); the latter did constrict in response to 60 mmol/L  
205 KCl (**Figure 5E**). This study observed a marked reduction in AT1aR expression in the media  
206 of SM-*Agtr1a*<sup>-/-</sup> mesenteric arteries compared to wild-type (**Figure 1B**), in keeping with this  
207 receptor mediating myogenic constriction in mesenteric arteries.

### 208 **3.3 AT1aR contribute to myogenic constriction in cerebral arteries**

209 Next, we studied the function of AT1aRs in cerebral arteries. Vessels were equilibrated at 15  
210 mmHg (30 min) and following an assessment of KCl-induced constriction, arteries were  
211 pressurized to 80 mmHg (**Figure 6A**). Ang II constrictions and myogenic constriction was  
212 significantly decreased in SM-*Agtr1a*<sup>-/-</sup> arteries compared to wild-type (**Figure 6A, B, C, D**).  
213 Both wild-type and SM-*Agtr1a*<sup>-/-</sup> arteries produced similar constrictions when exposed to 60  
214 mmol/L KCl (**Figure 6E**). The results demonstrate a key role of AT1aR in the myogenic  
215 response of mouse cerebral arteries.

### 216 **3.4 G<sub>q/11</sub> protein dependent signaling pathway is responsible for myogenic tone**

217 To explore the role of G<sub>q/11</sub> and β-arrestin signaling pathways downstream of AT1R, we used  
218 the biased agonists TRV120055 and SII to activate G<sub>q/11</sub> and β-arrestin signaling pathways,  
219 respectively (29) (34) (51). We found that TRV120055 increased vascular tone in mesenteric  
220 arteries (**Figure 7A, B**), whereas SII had no effect (**Figure 7C, D**). Similarly, TRV120055 and  
221 TRV120056 (another biased G<sub>q/11</sub> coupled AT1R agonist) enhanced dose-dependent  
222 perfusion pressure in isolated kidneys (**Figure 8A, C**), whereas SII had no effect (**Figure 8B,**  
223 **C**). The removal of external Ca<sup>2+</sup> abolished agonist-induced vasoconstrictions in perfused  
224 kidneys (**Figure 8D**), indicating AT1aRs mediate vasoconstriction *via* canonical G<sub>q/11</sub> but not  
225 noncanonical β-arrestin pathways. To confirm the results, we next examined the effects of  
226 FR900359, a selective G<sub>q/11</sub>-protein inhibitor (23) (47) (35). FR900359 abolished both  
227 myogenic and Ang II-dependent constrictions in renal arterioles (**Figure 9**) and mesenteric  
228 arteries (**Figure 7E, F**). These results indicate that myogenic vasoconstriction is mediated

229 through the mechanosensitive AT1aR and the canonical  $G_{q/11}$  signaling pathway.

#### 230 **4. Discussion**

231 The study found that the canonical  $G_{q/11}$  signaling of mechanoactivated AT1aR is responsible  
232 for myogenic vasoconstriction in mesenteric, renal arteries and cerebral arteries. We  
233 observed a loss of myogenic autoregulation in the renal circulation of *Agtr1a*<sup>-/-</sup> mice, an effect  
234 which was normal in *Agtr1b*<sup>-/-</sup> mice. Similarly, we found that myogenic tone was strongly  
235 reduced in two other myogenic arteries (mesentery and cerebral) from smooth muscle  
236 specific AT1aR-deficient (*SM-Agtr1a*<sup>-/-</sup>) mice compared to wild-type. Using the  
237 pharmacological  $G_{q/11}$  inhibitor FR900359 and several GPCR biased agonists, we showed  
238 that AT1Rs cause vasoconstriction *via* canonical  $G_{q/11}$  signaling but not alternative G protein  
239 signaling downstream of the AT1R.

#### 240 *AT1aRs are primary mechanosensors in intact arteries*

241 Multiple GPCRs have been proposed to act as mechanosensors to regulate myogenic tone in  
242 resistance arteries. While stretch induces activation of purinergic P2Y6 UDP receptors,  
243 thromboxane A2 (TP) receptors and sphingosine-1-phosphate (S1P) receptors in certain  
244 vascular beds (27) (28) (30), the AT1R remains one of the best characterized mechanosensor  
245 in the vasculature (49) (55). Humans express a single type of AT1R, whereas two isoforms  
246 (AT1aR and AT1bR) are present in rodents (36) (53). Using *Agtr1a*<sup>-/-</sup> mice and inverse AT1R  
247 agonist, our previous data suggested that ligand-independent AT1aR activation is required for  
248 myogenic response in resistance mesenteric arteries and renal arterioles (46). However, two  
249 recent studies reported that myogenic tone was diminished in *Agtr1b*<sup>-/-</sup> mesenteric and  
250 cerebral arteries, which implies a possible role of AT1bRs in mechanosensation (42) (3). In  
251 contrast, we found that myogenic tone was normal in *Agtr1b*<sup>-/-</sup> perfused kidneys, which argues  
252 against a role of AT1bR in myogenic constriction in the renal circulation. This data was,  
253 however, obtained in global mutant mice, which often display compensatory mechanisms for  
254 the lack of AT1Rs. Moreover, AT1aR and AT1bR are expressed at similar levels in cerebral  
255 parenchymal arterioles and genetic knockout of AT1aR (but not AT1bR) blunted the ability of  
256 these vessels to generate myogenic tone (52). The latter effect is opposite to cerebral arteries  
257 where genetic knockout of AT1bR blunted the ability to develop myogenic tone (42). To  
258 overcome these potential limitations, we generated tamoxifen-inducible *SM-Agtr1a*  
259 (*SMMHC-Cre+Agtr1a*<sup>flox/flox</sup>) mice for careful phenotypic investigation. We found that myogenic  
260 constriction was impaired in cerebral, mesenteric and renal arteries isolated from smooth  
261 muscle AT1aR-deficient mice. The data provide firm evidence that AT1aRs play a key role as



262 mechanosensors mediating myogenic constriction in the murine vasculature.

263 *AT1aRs downstream signaling to cause vasoconstriction*

264 We next explored downstream signaling pathways mediated by  $G_{q/11}$  and/or  $\beta$  arrestins of the  
265 AT1R in the vascular response. In cell culture, osmotic cell stretch has been found to increase  
266 the binding affinity and potency of the  $\beta$ -arrestin-biased agonist TRV120023 with no effect on  
267 the balanced agonist Ang II through AT1R to induce a conformation change of  $\beta$ -arrestin 2,  
268 similar to that induced by  $\beta$ -arrestin-biased agonists (50). Similarly, hypo-osmotic stretch  
269 induced  $\beta$ -arrestin-biased signaling of AT1Rs in the absence of G protein activation (44). We  
270 failed to observe  $\beta$ -arrestin mediated enhancement of myogenic vasoconstriction with the  
271  $\beta$ -arrestin biased agonist SII in intact arteries (mesenteric and renal arteries: **Figure 10**). The  
272 discrepancy might be caused by differences between the hypo-osmotic cell swelling and  
273 tensile stretch on the smooth muscle cell layer in intact arteries to cause mechanoactivation of  
274 AT1aRs *in situ*. GPCRs biased mechanisms have been described between two different G  
275 proteins, between  $\beta$ -arrestin-1 and 2, and between different states of the same receptor  
276 bound to different ligands (12) (21) (54). However, the majority of well described GPCRs  
277 biased ligand examples refers to selective G protein signaling versus  $\beta$ -arrestin-mediated  
278 signaling (20) (33) (43) (51). AT1aR is one of the best characterized GPCR enabling biased  
279 receptor signaling. It can be activated in either a canonical G protein-dependent signaling  
280 mode (5) (37) or noncanonical  $\beta$ -arrestin-mediated signaling mode (44) (50). In line, we found  
281 that the natural biased agonist Ang II was able to increase G protein signaling of  
282 mechanoactivated AT1R receptors to enhance the vasoconstrictor response.

283 We hypothesized that  $G_{q/11}$  signaling contributes to myogenic tone in mesenteric and  
284 renal arteries and consistent with this idea, we found that the vasoconstrictor responses were  
285 strongly increased by the  $G_{q/11}$  AT1R biased agonists TRV120055 and TRV20056 (**Figure 10**).  
286 Moreover, we found that the  $G_{q/11}$  blocker FR900359 inhibited both myogenic tone and Ang II  
287 induced constrictions in mesenteric arteries and renal arterioles (**Figure 10**). The data imply  
288 that myogenic vasoconstriction requires canonical  $G_{q/11}$  signaling of the AT1aR. Consistently,  
289 myogenic tone is increased in the absence of regulator of G-protein signaling 2 (RGS2),  
290 which is an endogenous terminator of  $G_{\alpha_{q/11}}$  ( $G\alpha_{q/11}$ ) signaling (19) (37). The data align  
291 with findings indicating that mechanically activated AT1R generate diacylglycerol, which in  
292 turn activates protein kinase C (PKC) and induces the actin cytoskeleton reorganization  
293 necessary for pressure-induced vasoconstriction (22). Finally, our conclusions are supported  
294 by findings indicating that another  $G_{q/11}$ -protein inhibitor YM 254890 profoundly reduced

295 myogenic tone in mesenteric arteries (49). Note, this data contrast with recent findings, which  
296 proposed that  $G_{12/13}$ - and Rho/Rho kinase-mediated signaling is required in myogenic  
297 vasoconstriction by inhibition of myosin phosphatase (5). The reason for the discrepancy is  
298 presently unknown, but may depend on which vessel order was utilized, i.e. 3<sup>rd</sup> or 4<sup>th</sup> order  
299 mesenteric versus 1<sup>st</sup> or 2<sup>nd</sup> order mesenteric arteries. Moreover, the myogenic response was  
300 only reduced by 50% in  $G_{12/13}$ -deficient cerebral arteries (5), which may indicate that this  
301 pathway may play a role in some but not all vessels. Thus, it is possible that the relevance to  
302 the two signaling pathway differs between various vascular beds and artery branches. Our  
303 study provides firm evidence that AT1aRs coupled to  $G_{q/11}$  signaling is an essential  
304 component of dynamic mechanochemical signaling in arterial vascular smooth muscle cells  
305 causing myogenic tone (**Figure 10**).

306 Signaling of most GPCRs *via* G proteins is terminated (desensitization) by the  
307 phosphorylation of active receptor by specific kinases (GPCR kinases, or GRKs) and  
308 subsequent binding of  $\beta$ -arrestins that selectively recognize active phosphorylated receptors.  
309 Although, GRKs and  $\beta$ -arrestins play also a role in multiple noncanonical signaling pathways  
310 in the cell, both GPCR-initiated and receptor-independent (32) (15), our study failed to  
311 demonstrate that this pathway plays an important role in the myogenic response (**Figure 10**).  
312 Thus, it is unlikely that blood pressure lowering effects of  $\beta$ -arrestin biased AT1R agonists,  
313 e.g. Trevena 120027 (4), are caused by direct effects of this GPCR in the arterial smooth  
314 muscle cells.

315 In summary, we provide new and firm evidence for a mechanosensitive function of  
316 AT1aR in myogenic vasoconstriction in mesenteric, renal and cerebral arteries, i.e. in three  
317 different highly myogenic vascular beds. Our study clearly shows that mechanical stress  
318 activates AT1R in arterial smooth muscle cells, which subsequently triggers canonical  $G_{q/11}$   
319 signaling, irrespective of GRK/ $\beta$ -arrestin signaling, to cause myogenic vasoconstriction. Our  
320 results argue against the idea of multiple mechanosensors coupled to noncanonical  $\beta$ -arrestin  
321 pathways generating myogenic arterial tone. These findings lay ground for additional studies  
322 to characterize the molecular mechanisms of mechanoactivated AT1aR coupled to  $G_{q/11}$   
323 signaling in intact arteries, which may reveal new molecular targets for drug development to  
324 alleviate increased or dysregulated arterial tone in hypertension and other cardiovascular  
325 diseases.

326

327 **Acknowledgments**

328 The Deutsche Forschungsgemeinschaft (DFG) supported our study (M.G.). We thank  
329 Thomas Coffman for providing *Agtr1a*<sup>-/-</sup>, *Agtr1b*<sup>+/-</sup> and *Agtr1a*<sup>flox</sup> mice. We thank Gabriele M.  
330 König and Evi Kostenis for FR900359.

331

## 332 **References**

- 333 1. **Balakumar P and Jagadeesh G.** A century old renin-angiotensin system still grows  
334 with endless possibilities: AT1 receptor signaling cascades in cardiovascular  
335 physiopathology. *Cell Signal* 26: 2147-2160, 2014.
- 336 2. **Bayliss WM.** On the local reactions of the arterial wall to changes of internal  
337 pressure. *The Journal of physiology* 28: 220-231, 1902.
- 338 3. **Blodow S, Schneider H, Storch U, Wizemann R, Forst AL, Gudermann T, and**  
339 **Mederos y Schnitzler M.** Novel role of mechanosensitive AT1B receptors in myogenic  
340 vasoconstriction. *Pflugers Archiv : European journal of physiology* 466: 1343-1353, 2014.
- 341 4. **Boerrigter G, Lark MW, Whalen EJ, Soergel DG, Violin JD, and Burnett JC, Jr.**  
342 Cardiorenal actions of TRV120027, a novel ss-arrestin-biased ligand at the angiotensin II  
343 type I receptor, in healthy and heart failure canines: a novel therapeutic strategy for  
344 acute heart failure. *Circ Heart Fail* 4: 770-778, 2011.
- 345 5. **Chennupati R, Wirth A, Favre J, Li R, Bonnavion R, Jin Y-J, Wietelmann A,**  
346 **Schweda F, Wettschureck N, Henrion D, and Offermanns S.** Myogenic  
347 vasoconstriction requires G/G and LARG to maintain local and systemic vascular  
348 resistance. *Elife* 8, 2019.
- 349 6. **Cipolla MJ and Curry AB.** Middle cerebral artery function after stroke: the  
350 threshold duration of reperfusion for myogenic activity. *Stroke* 33: 2094-2099, 2002.
- 351 7. **Coats P, Johnston F, MacDonald J, McMurray JJ, and Hillier C.** Signalling  
352 mechanisms underlying the myogenic response in human subcutaneous resistance  
353 arteries. *Cardiovascular research* 49: 828-837, 2001.
- 354 8. **Davis MJ.** Perspective: physiological role(s) of the vascular myogenic response.  
355 *Microcirculation (New York, NY : 1994)* 19: 99-114, 2012.
- 356 9. **Davis MJ and Hill MA.** Signaling mechanisms underlying the vascular myogenic  
357 response. *Physiol Rev* 79: 387-423, 1999.
- 358 10. **Ercu M, Marko L, Schachterle C, Tsvetkov D, Cui Y, Maghsodi S, Bartolomaeus**  
359 **TUP, Maass PG, Zuhlke K, Gregersen N, Hubner N, Hodge R, Muhl A, Pohl B,**  
360 **Mole-Illas R, Geelhaar A, Walter S, Napieczynska H, Schelenz S, Taube M, Heuser A,**

- 
- 361 **Anistan YM, Qadri F, Todiras M, Plehm R, Popova E, Langanke R, Eichhorst J,**  
362 **Lehmann M, Wiesner B, Russwurm M, Forslund SK, Kamer I, Muller DN, Gollasch M,**  
363 **Aydin A, Bahring S, Bader M, Luft FC, and Klussmann E.** Phosphodiesterase 3A and  
364 Arterial Hypertension. *Circulation*, 2020.
- 365 11. **Fan G, Kassmann M, Cui Y, Matthaeus C, Kunz S, Zhong C, Zhu S, Xie Y, Tsvetkov**  
366 **D, Daumke O, Huang Y, and Gollasch M.** Age attenuates the T-type CaV 3.2-RyR axis in  
367 vascular smooth muscle. *Aging Cell* 19: e13134, 2020.
- 368 12. **Gesty-Palmer D, Chen M, Reiter E, Ahn S, Nelson CD, Wang S, Eckhardt AE,**  
369 **Cowan CL, Spurney RF, Luttrell LM, and Lefkowitz RJ.** Distinct beta-arrestin- and G  
370 protein-dependent pathways for parathyroid hormone receptor-stimulated ERK1/2  
371 activation. *The Journal of biological chemistry* 281: 10856-10864, 2006.
- 372 13. **Groneberg D, Konig P, Wirth A, Offermanns S, Koesling D, and Friebe A.** Smooth  
373 muscle-specific deletion of nitric oxide-sensitive guanylyl cyclase is sufficient to induce  
374 hypertension in mice. *Circulation* 121: 401-409, 2010.
- 375 14. **Gschwend S, Henning RH, Pinto YM, de Zeeuw D, van Gilst WH, and Buikema H.**  
376 Myogenic constriction is increased in mesenteric resistance arteries from rats with  
377 chronic heart failure: instantaneous counteraction by acute AT1 receptor blockade.  
378 *British journal of pharmacology* 139: 1317-1325, 2003.
- 379 15. **Gurevich VV and Gurevich EV.** GPCR Signaling Regulation: The Role of GRKs and  
380 Arrestins. *Front Pharmacol* 10: 125, 2019.
- 381 16. **Hansen PB, Jensen BL, Andreasen D, and Skøtt O.** Differential expression of T-  
382 and L-type voltage-dependent calcium channels in renal resistance vessels. *Circulation*  
383 *research* 89: 630-638, 2001.
- 384 17. **Harder DR.** Pressure-dependent membrane depolarization in cat middle cerebral  
385 artery. *Circulation research* 55: 197-202, 1984.
- 386 18. **Heinze C, Seniuk A, Sokolov MV, Huebner AK, Klementowicz AE, Szijarto IA,**  
387 **Schleifenbaum J, Vitzthum H, Gollasch M, Ehmke H, Schroeder BC, and Hubner CA.**  
388 Disruption of vascular Ca<sup>2+</sup>-activated chloride currents lowers blood pressure. *J Clin*  
389 *Invest* 124: 675-686, 2014.
- 390 19. **Hercule HC, Tank J, Plehm R, Wellner M, da Costa Goncalves AC, Gollasch M,**  
391 **Diedrich A, Jordan J, Luft FC, and Gross V.** Regulator of G protein signalling 2  
392 ameliorates angiotensin II-induced hypertension in mice. *Exp Physiol* 92: 1014-1022,  
393 2007.

- 
- 394 20. **Hodavance SY, Gareri C, Torok RD, and Rockman HA.** G Protein-coupled Receptor  
395 Biased Agonism. *Journal of Cardiovascular Pharmacology* 67: 193-202, 2016.
- 396 21. **Hoffmann C, Ziegler N, Reiner S, Krasel C, and Lohse MJ.** Agonist-selective,  
397 receptor-specific interaction of human P2Y receptors with beta-arrestin-1 and -2. *The*  
398 *Journal of biological chemistry* 283: 30933-30941, 2008.
- 399 22. **Hong K, Zhao G, Hong Z, Sun Z, Yang Y, Clifford PS, Davis MJ, Meininger GA, and**  
400 **Hill MA.** Mechanical activation of angiotensin II type 1 receptors causes actin  
401 remodelling and myogenic responsiveness in skeletal muscle arterioles. *J Physiol* 594:  
402 7027-7047, 2016.
- 403 23. **Inamdar V, Patel A, Manne BK, Dangelmaier C, and Kunapuli SP.**  
404 Characterization of UBO-QIC as a Galphaq inhibitor in platelets. *Platelets* 26: 771-778,  
405 2015.
- 406 24. **Ito M, Oliverio MI, Mannon PJ, Best CF, Maeda N, Smithies O, and Coffman TM.**  
407 Regulation of blood pressure by the type 1A angiotensin II receptor gene. *Proc Natl Acad*  
408 *Sci U S A* 92: 3521-3525, 1995.
- 409 25. **Jarve A, Todiras M, Lian X, Filippelli-Silva R, Qadri F, Martin RP, Gollasch M, and**  
410 **Bader M.** Distinct roles of angiotensin receptors in autonomic dysreflexia following  
411 high-level spinal cord injury in mice. *Exp Neurol* 311: 173-181, 2019.
- 412 26. **Kaßmann M, Szijártó IA, García-Prieto CF, Fan G, Schleifenbaum J, Anistan Y-M,**  
413 **Tabeling C, Shi Y, le Noble F, Witzenrath M, Huang Y, Markó L, Nelson MT, and**  
414 **Gollasch M.** Role of Ryanodine Type 2 Receptors in Elementary Ca Signaling in Arteries  
415 and Vascular Adaptive Responses. *J Am Heart Assoc* 8: e010090, 2019.
- 416 27. **Kauffmanstein G, Laher I, Matrougui K, Guérineau NC, and Henrion D.** Emerging  
417 role of G protein-coupled receptors in microvascular myogenic tone. *Cardiovascular*  
418 *research* 95: 223-232, 2012.
- 419 28. **Kauffmanstein G, Tamarelle S, Prunier F, Roy C, Ayer A, Toutain B, Billaud M,**  
420 **Isakson BE, Grimaud L, Loufrani L, Rousseau P, Abraham P, Procaccio V, Monyer H,**  
421 **de Wit C, Boeynaems J-M, Robaye B, Kwak BR, and Henrion D.** Central Role of P2Y6  
422 UDP Receptor in Arteriolar Myogenic Tone. *Arteriosclerosis, thrombosis, and vascular*  
423 *biology* 36: 1598-1606, 2016.
- 424 29. **Kendall RT, Strungs EG, Rachidi SM, Lee M-H, El-Shewy HM, Luttrell DK, Janech**  
425 **MG, and Luttrell LM.** The beta-arrestin pathway-selective type 1A angiotensin receptor  
426 (AT1A) agonist [Sar<sup>1</sup>,Ile<sup>4</sup>,Ile<sup>8</sup>]angiotensin II regulates a robust G protein-independent

- 
- 427 signaling network. *The Journal of biological chemistry* 286: 19880-19891, 2011.
- 428 30. **Kroetsch JT and Bolz S-S.** The TNF- $\alpha$ /sphingosine-1-phosphate signaling axis  
429 drives myogenic responsiveness in heart failure. *Journal of vascular research* 50: 177-185,  
430 2013.
- 431 31. **Ledoux J, Gee DM, and Leblanc N.** Increased peripheral resistance in heart failure:  
432 new evidence suggests an alteration in vascular smooth muscle function. *British journal*  
433 *of pharmacology* 139: 1245-1248, 2003.
- 434 32. **Lefkowitz RJ.** A brief history of G-protein coupled receptors (Nobel Lecture). *Angew*  
435 *Chem Int Ed Engl* 52: 6366-6378, 2013.
- 436 33. **Lefkowitz RJ.** Historical review: a brief history and personal retrospective of  
437 seven-transmembrane receptors. *Trends in pharmacological sciences* 25: 413-422, 2004.
- 438 34. **Li W, Xu J, Kou X, Zhao R, Zhou W, and Fang X.** Single-molecule force spectroscopy  
439 study of interactions between angiotensin II type 1 receptor and different biased ligands  
440 in living cells. *Anal Bioanal Chem* 410: 3275-3284, 2018.
- 441 35. **Lian X, Beer-Hammer S, Konig GM, Kostenis E, Nurnberg B, and Gollasch M.**  
442 RXFP1 Receptor Activation by Relaxin-2 Induces Vascular Relaxation in Mice via a  
443 Galphai2-Protein/PI3Ks/gamma/Nitric Oxide-Coupled Pathway. *Front Physiol* 9: 1234,  
444 2018.
- 445 36. **Madhun ZT, Ernsberger P, Ke FC, Zhou J, Hopfer U, and Douglas JG.** Signal  
446 transduction mediated by angiotensin II receptor subtypes expressed in rat renal  
447 mesangial cells. *Regul Pept* 44: 149-157, 1993.
- 448 37. **Mederos y Schnitzler M, Storch U, Meibers S, Nurwakagari P, Breit A, Essin K,**  
449 **Gollasch M, and Gudermann T.** Gq-coupled receptors as mechanosensors mediating  
450 myogenic vasoconstriction. *Embo j* 27: 3092-3103, 2008.
- 451 38. **Moosmang S, Schulla V, Welling A, Feil R, Feil S, Wegener JW, Hofmann F, and**  
452 **Klugbauer N.** Dominant role of smooth muscle L-type calcium channel Cav1.2 for blood  
453 pressure regulation. *Embo j* 22: 6027-6034, 2003.
- 454 39. **Nelson MT, Patlak JB, Worley JF, and Standen NB.** Calcium channels, potassium  
455 channels, and voltage dependence of arterial smooth muscle tone. *Am J Physiol* 259:  
456 C3-18, 1990.
- 457 40. **Oliverio MI, Kim HS, Ito M, Le T, Audoly L, Best CF, Hiller S, Kluckman K, Maeda**  
458 **N, Smithies O, and Coffman TM.** Reduced growth, abnormal kidney structure, and type  
459 2 (AT<sub>2</sub>) angiotensin receptor-mediated blood pressure regulation in mice lacking both



- 
- 460 AT1A and AT1B receptors for angiotensin II. *Proceedings of the National Academy of*  
461 *Sciences of the United States of America* 95: 15496-15501, 1998.
- 462 41. **Pires PW, Jackson WF, and Dorrance AM.** Regulation of myogenic tone and  
463 structure of parenchymal arterioles by hypertension and the mineralocorticoid receptor.  
464 *Am J Physiol Heart Circ Physiol* 309: H127-136, 2015.
- 465 42. **Pires PW, Ko EA, Pritchard HAT, Rudokas M, Yamasaki E, and Earley S.** The  
466 angiotensin II receptor type 1b is the primary sensor of intraluminal pressure in  
467 cerebral artery smooth muscle cells. *J Physiol (Lond)* 595: 4735-4753, 2017.
- 468 43. **Rajagopal S, Ahn S, Rominger DH, Gowen-MacDonald W, Lam CM, Dewire SM,**  
469 **Violin JD, and Lefkowitz RJ.** Quantifying ligand bias at seven-transmembrane receptors.  
470 *Mol Pharmacol* 80: 367-377, 2011.
- 471 44. **Rakesh K, Yoo B, Kim IM, Salazar N, Kim KS, and Rockman HA.**  
472 beta-Arrestin-biased agonism of the angiotensin receptor induced by mechanical stress.  
473 *Sci Signal* 3: ra46, 2010.
- 474 45. **Sauvé M, Hui SK, Dinh DD, Foltz WD, Momen A, Nedospasov SA, Offermanns S,**  
475 **Husain M, Kroetsch JT, Lidington D, and Bolz S-S.** Tumor Necrosis  
476 Factor/Sphingosine-1-Phosphate Signaling Augments Resistance Artery Myogenic Tone  
477 in Diabetes. *Diabetes* 65: 1916-1928, 2016.
- 478 46. **Schleifenbaum J, Kassmann M, Szijarto IA, Hercule HC, Tano JY, Weinert S,**  
479 **Heidenreich M, Pathan AR, Anistan YM, Alenina N, Rusch NJ, Bader M, Jentsch TJ,**  
480 **and Gollasch M.** Stretch-activation of angiotensin II type 1a receptors contributes to the  
481 myogenic response of mouse mesenteric and renal arteries. *Circ Res* 115: 263-272, 2014.
- 482 47. **Schrage R, Schmitz A-L, Gaffal E, Annala S, Kehraus S, Wenzel D, Büllesbach KM,**  
483 **Bald T, Inoue A, Shinjo Y, Galandrin S, Shridhar N, Hesse M, Grundmann M, Merten**  
484 **N, Charpentier TH, Martz M, Butcher AJ, Slodczyk T, Armando S, Efferm M, Namkung**  
485 **Y, Jenkins L, Horn V, Stößel A, Dargatz H, Tietze D, Imhof D, Galés C, Drewke C,**  
486 **Müller CE, Hölzel M, Milligan G, Tobin AB, Gomeza J, Dohlman HG, Sondek J, Harden**  
487 **TK, Bouvier M, Laporte SA, Aoki J, Fleischmann BK, Mohr K, König GM, Tüting T,**  
488 **and Kostenis E.** The experimental power of FR900359 to study Gq-regulated biological  
489 processes. *Nature Communications* 6, 2015.
- 490 48. **Sparks MA, Parsons KK, Stegbauer J, Gurley SB, Vivekanandan-Giri A, Fortner**  
491 **CN, Snouwaert J, Raasch EW, Griffiths RC, Haystead TAJ, Le TH, Pennathur S, Koller**  
492 **B, and Coffman TM.** Angiotensin II type 1A receptors in vascular smooth muscle cells do

493 not influence aortic remodeling in hypertension. *Hypertension (Dallas, Tex : 1979)* 57:  
494 577-585, 2011.

495 49. **Storch U, Blodow S, Gudermann T, and Mederos Y Schnitzler M.** Cysteinyl  
496 leukotriene 1 receptors as novel mechanosensors mediating myogenic tone together  
497 with angiotensin II type 1 receptors-brief report. *Arteriosclerosis, thrombosis, and*  
498 *vascular biology* 35: 121-126, 2015.

499 50. **Tang W, Strachan RT, Lefkowitz RJ, and Rockman HA.** Allosteric Modulation of  
500  $\beta$ -Arrestin-biased Angiotensin II Type 1 Receptor Signaling by Membrane Stretch.  
501 *Journal of Biological Chemistry* 289: 28271-28283, 2014.

502 51. **Wei H, Ahn S, Shenoy SK, Karnik SS, Hunyady L, Luttrell LM, and Lefkowitz RJ.**  
503 Independent beta-arrestin 2 and G protein-mediated pathways for angiotensin II  
504 activation of extracellular signal-regulated kinases 1 and 2. *Proceedings of the National*  
505 *Academy of Sciences of the United States of America* 100: 10782-10787, 2003.

506 52. **Yamasaki E, Thakore P, Krishnan V, and Earley S.** Differential expression of  
507 angiotensin II type 1 receptor subtypes within the cerebral microvasculature. *Am J*  
508 *Physiol Heart Circ Physiol* 318: H461-H469, 2020.

509 53. **Zhou J, Ernsberger P, and Douglas JG.** A novel angiotensin receptor subtype in rat  
510 mesangium. Coupling to adenylyl cyclase. *Hypertension (Dallas, Tex : 1979)* 21:  
511 1035-1038, 1993.

512 54. **Zidar DA, Violin JD, Whalen EJ, and Lefkowitz RJ.** Selective engagement of G  
513 protein coupled receptor kinases (GRKs) encodes distinct functions of biased ligands.  
514 *Proceedings of the National Academy of Sciences of the United States of America* 106:  
515 9649-9654, 2009.

516 55. **Zou Y, Akazawa H, Qin Y, Sano M, Takano H, Minamino T, Makita N, Iwanaga K,**  
517 **Zhu W, Kudoh S, Toko H, Tamura K, Kihara M, Nagai T, Fukamizu A, Umemura S, Iiri**  
518 **T, Fujita T, and Komuro I.** Mechanical stress activates angiotensin II type 1 receptor  
519 without the involvement of angiotensin II. *Nat Cell Biol* 6: 499-506, 2004.

520

## 521 **Figure legends**

522 **Figure 1: Conditional deletion of AT1a receptors in vascular smooth muscle cells of**  
523 **arteries. A:** Schematic representation of the mouse allele containing loxP sequences, and the  
524 floxed allele after the action of Cre recombinase. **B:** Immunofluorescence staining results  
525 show that AT1R (red) is highly expressed in the mesenteric artery of *Agtr1a<sup>+/+</sup>* mice. In

526 SM-*Agtr1a*<sup>-/-</sup> mouse mesenteric artery, the expression of AT1R is specifically reduced in  
527 smooth muscle cells. Scale bar: 40 μm.

528 **Figure 2: Vasoregulation in isolated perfused kidneys of *Agtr1a*<sup>-/-</sup> mice.** **A, B:** Original  
529 recordings of perfusion pressure in kidneys of *Agtr1a*<sup>+/+</sup> (**A**) and *Agtr1a*<sup>-/-</sup> mice (**B**). **C:** Increase  
530 in the perfusion pressure induced by 100 nM Ang II. **D:** Myogenic tone assessed by exposure  
531 to Ca<sup>2+</sup> free PSS. **E:** Perfusion pressure at flow rates of 0.3 ml/min, 0.7 ml/min, 1.3 ml/min and  
532 1.9 ml/min. **F:** Increase in the perfusion pressure induced by 60mM KCl. n=6 *Agtr1a*<sup>+/+</sup> kidneys  
533 and n=7 *Agtr1a*<sup>-/-</sup> kidneys for all panels. \*p<0.05; n.s., not significant.

534 **Figure 3: Vasoregulation in isolated perfused kidneys of *Agtr1b*<sup>-/-</sup> mice.** **A, B:** Original  
535 recordings of the perfusion pressure in kidneys of *Agtr1b*<sup>+/+</sup> (**A**) and *Agtr1b*<sup>-/-</sup> mice (**B**). **C:**  
536 Increase in perfusion pressure induced by 10 nM Ang II. **D:** Change of pressure assessed by  
537 exposure to Ca<sup>2+</sup> free PSS. **E:** Perfusion pressure at flow rates of 0.3 ml/min, 0.7 ml/min, 1.3  
538 ml/min and 1.9 ml/min. **F:** Increase in perfusion pressure induced by 60 mM KCl. n=6  
539 *Agtr1b*<sup>+/+</sup> kidneys and n=6 *Agtr1b*<sup>-/-</sup> kidneys for all panels. w.o., wash-out; n.s., not significant.

540 **Figure 4: Vasoregulation in isolated perfused kidneys of SM-*Agtr1a*<sup>-/-</sup> mice.** **A, B:**  
541 Original recordings of the perfusion pressure in kidneys of *Agtr1a*<sup>+/+</sup> (**A**) and SM-*Agtr1a*<sup>-/-</sup> mice  
542 (**B**). **C:** Increase in perfusion pressure induced by 10 nM Ang II. **D:** Change of pressure  
543 assessed by exposure to Ca<sup>2+</sup> free PSS. **E:** Perfusion pressure at flow rates of 0.3 ml/min, 0.7  
544 ml/min, 1.3 ml/min, and 1.9 ml/min. **F:** Increase in perfusion pressure induced by 60 mM KCl.  
545 n=6 *Agtr1a*<sup>+/+</sup> kidneys and n=6 SM-*Agtr1a*<sup>-/-</sup> kidneys for all panels. \*p<0.05; n.s., not  
546 significant.

547 **Figure 5: Myogenic tone in mesenteric arteries.** **A, B:** Representative recordings of MA  
548 diameter during a series of pressure steps from 20 to 100 mmHg in 20 mmHg increments in  
549 control conditions (+Ca<sup>2+</sup>) and in Ca<sup>2+</sup> free solution (-Ca<sup>2+</sup>). Arteries were isolated from  
550 *Agtr1a*<sup>+/+</sup> (**A**) and SM-*Agtr1a*<sup>-/-</sup> mice (**B**). Note the increase in active constriction over the entire  
551 pressure range from 60 to 100 mmHg in vessels from *Agtr1a*<sup>+/+</sup>, but not from SM-*Agtr1a*<sup>-/-</sup>  
552 mice. Vasodilation in Ca<sup>2+</sup>-free solution was observed in *Agtr1a*<sup>+/+</sup> but not in SM-*Agtr1a*<sup>-/-</sup>  
553 arteries (P<0.05). **C:** Myogenic tone (at 80 mmHg) expressed as dilation of vessels induced  
554 by external Ca<sup>2+</sup> free solution (0 Ca/EGTA; n=6). **D to G:** Response to angiotensin II (Ang II;  
555 **D, E**) and 60 mM KCl (**F, G**) in MA of *Agtr1a*<sup>+/+</sup> and SM-*Agtr1a*<sup>-/-</sup> mice. MAs were pressurized

556 to 60 mmHg. Responses are expressed as relative changes in vessel inner diameter.  
557 *Agtr1a*<sup>+/+</sup>, n=5 vessels and SM-*Agtr1a*<sup>-/-</sup>, n=4 vessels for each group. \*p<0.05.

558 **Figure 6: Myogenic tone in cerebral arteries. A, B:** Representative recordings of  
559 middle/posterior cerebral arteries diameter at the pressure of 80 mmHg in control conditions  
560 (WT), Ang II 100 nmol/L, and in Ca<sup>2+</sup> free solution. **C:** Myogenic tone (at 80 mmHg) expressed  
561 as dilation of vessels induced by external Ca<sup>2+</sup> free solution. **D, E:** Response to Ang II (**D**) and  
562 60 mM KCl (**E**) in middle/posterior cerebral arteries of *Agtr1a*<sup>+/+</sup> and SM-*Agtr1a*<sup>-/-</sup> mice.  
563 *Agtr1a*<sup>+/+</sup>, n=6 vessels and SM-*Agtr1a*<sup>-/-</sup>, n=6 vessels for each group. \* p<0.05.

564 **Figure 7: Enhancement of the vascular tone by TRV120055. A, C, and E** Representative  
565 recordings of mesenteric artery diameter during a series of pressure steps from 20 to 100  
566 mmHg in 20 mmHg increments in control conditions (+Ca<sup>2+</sup>), TRV120055 100 nmol/L (**A**), SII  
567 100 nmol/L (**C**), FR120055 1 μmol/L (**E**) and in Ca<sup>2+</sup>-free solution. **B, D and F:** Average  
568 myogenic constriction of mesenteric arteries in drug-free physiological salt solution (PSS) and  
569 in PSS containing 100 nmol/L TRV120055 (**B**), 100 nmol/L SII (**D**), and 1 μmol/L FR120055  
570 (**F**) (n=6, 4 and 4, respectively). **G and H:** Response to Ang II in MA in drug-free PSS and  
571 PSS in presence of FR120055 at 80 mmHg (n=6 each). \*p<0.05; n.s., not significant.

572 **Figure 8: Function of biased AT1R agonists to vasoregulation in isolated perfused**  
573 **kidneys from *Agtr1a*<sup>+/+</sup> mice. A, B:** Original recordings of perfusion pressure in response  
574 to various flow rates (in ml/min), TRV120055 (**A**) or Sar-Ile II (**B**), Ca<sup>2+</sup> free perfusion solution  
575 (PSS Ca<sup>2+</sup> free) and re-exposure of the kidneys to PSS. **C:** Increase in perfusion pressure  
576 induced by TRV120055 and Sar-Ile II in various concentrations (10 nM to 1 μM). **D:** Change of  
577 perfusion pressure assessed by exposure of the kidneys to Ca<sup>2+</sup> free PSS at the presence of  
578 TRV120055 or Sar-Ile II at the concentration of 100 nM. **E:** Dose-response relationships for  
579 TRV120055 and TRV120056. **F:** Increase in perfusion pressure induced by 60 mM KCl.  
580 TRV120055, TRV120056, Sar-Ile II. n=6 kidneys in each group; n=6 kidneys in the control  
581 group. \*p<0.05; n.s., not significant; Control, *Agtr*<sup>+/+</sup> without biased ligand.

582 **Figure 9: Vasoregulation in isolated perfused kidneys of *Agtr1a*<sup>+/+</sup> mice pretreated with**  
583 **300 nM G<sub>q/11</sub> blocker FR900359. A:** Original recordings of perfusion pressure in kidneys of  
584 *Agtr*<sup>+/+</sup> mice in response to various concentrations of Angiotensin II (Ang II) **B:** same as A but  
585 pretreated with 300 nM FR900359 for 30 minutes. **C:** Increases in perfusion pressure induced

---

586 by Ang II (1 nM to 1  $\mu$ M). **D:** Myogenic tone assessed by exposure of the kidneys to  $\text{Ca}^{2+}$ -free  
587 PSS. **E:** Increase in perfusion pressure induced by 60 mM KCl. n=5 *Agtr<sup>+/+</sup>* kidneys and n=6  
588 *Agtr1a<sup>+/+</sup>* kidneys pretreated with FR900359 for all panels. \*p<0.05; w.o., wash-out; n.s., not  
589 significant.

590 **Figure 10:** Schematic illustration of angiotensin II type 1a receptor (AT1aR) biased signaling  
591 cascade regulating myogenic arterial tone. Canonical  $G_{q/11}$  signaling pathway of the AT1R  
592 (purple blue) causes myogenic vasoconstriction whereas noncanonical  $\beta$ -arrestin-biased  
593 signaling is not involved in this process.  $G_{q/11}$  proteins are heterotrimeric G proteins, which are  
594 made up of alpha ( $\alpha$ ), beta ( $\beta$ ) and gamma ( $\gamma$ ) subunits. The alpha subunit is attached to  
595 either a guanosine triphosphate (GTP) or guanosine diphosphate (GDP), which serves as an  
596 on-off switch for the activation of the G-protein. Upon activation of the AT1aR by either  
597 ligand-independent mechanical stretch or the natural-biased ligand angiotensin II (Ang II), the  
598  $G\beta\gamma$  complex is released from the  $G\alpha$  subunit after its GDP-GTP exchange for canonical G  
599 protein signaling to cause myogenic and/or humoral (Ang II-mediated) vasoconstriction. This  
600 pathway is inhibited by the  $G_{q/11}$  inhibitor FR900359. Although, GRKs and arrestins play a role  
601 in multiple noncanonical signaling pathways in cells, this pathway is unlikely engaged by  
602 mechanoactivated AT1Rs in response to tensile stretch or their natural ligand angiotensin II to  
603 cause vasoconstriction.

A

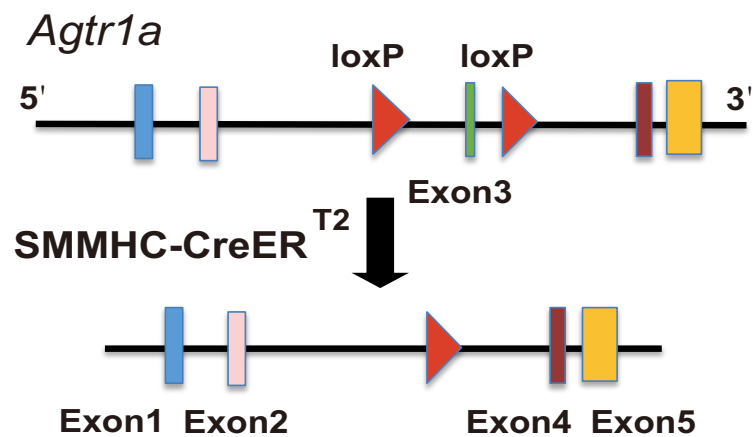

B

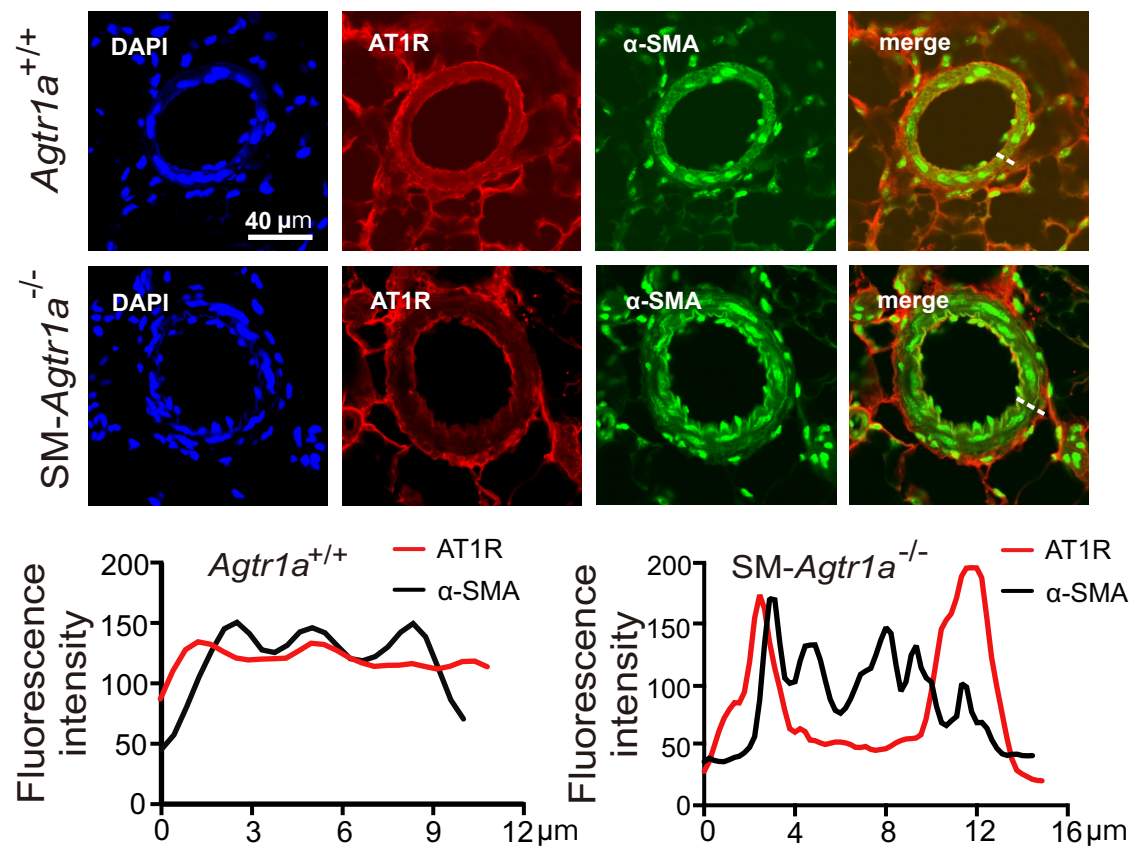

Figure 1



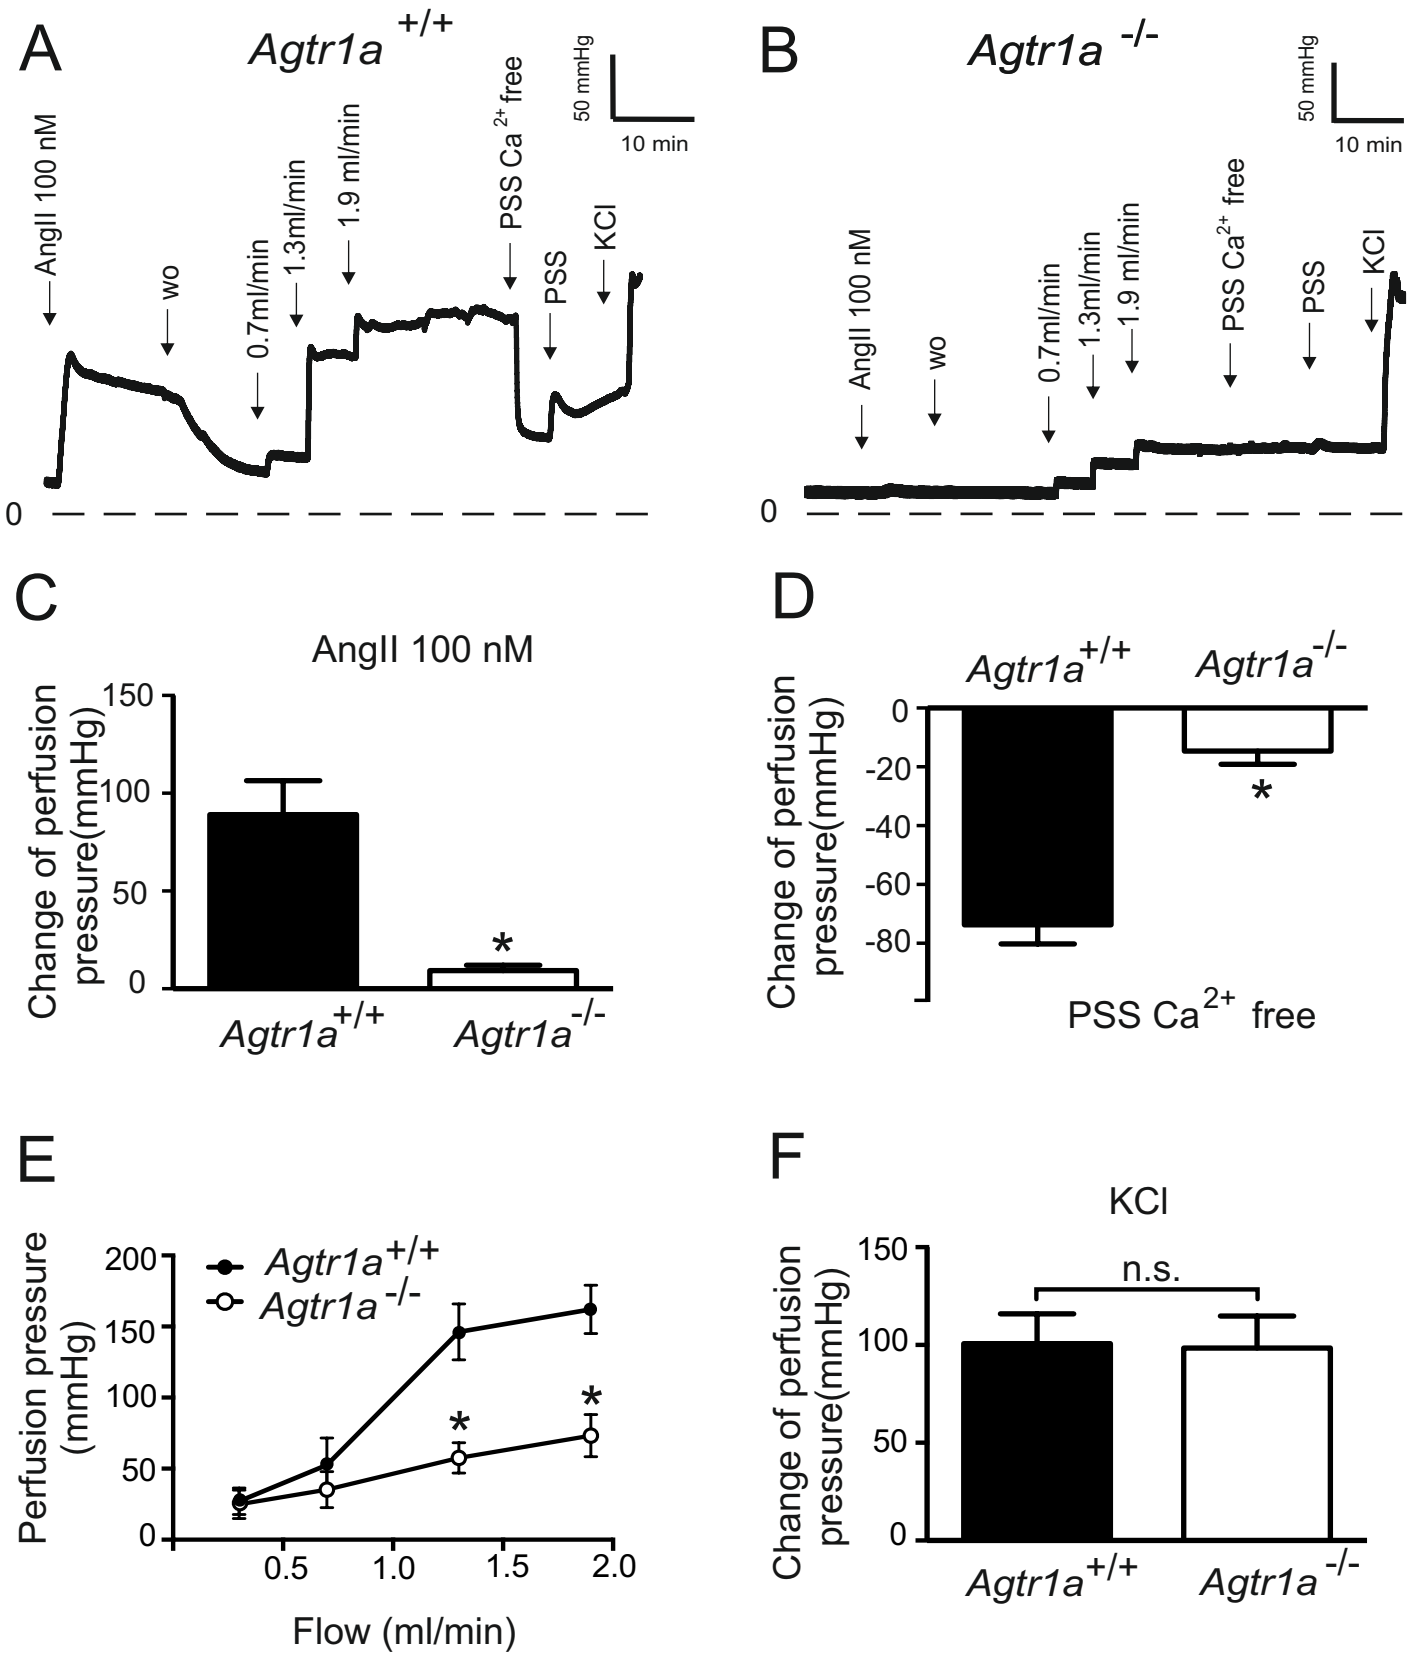

Figure 2

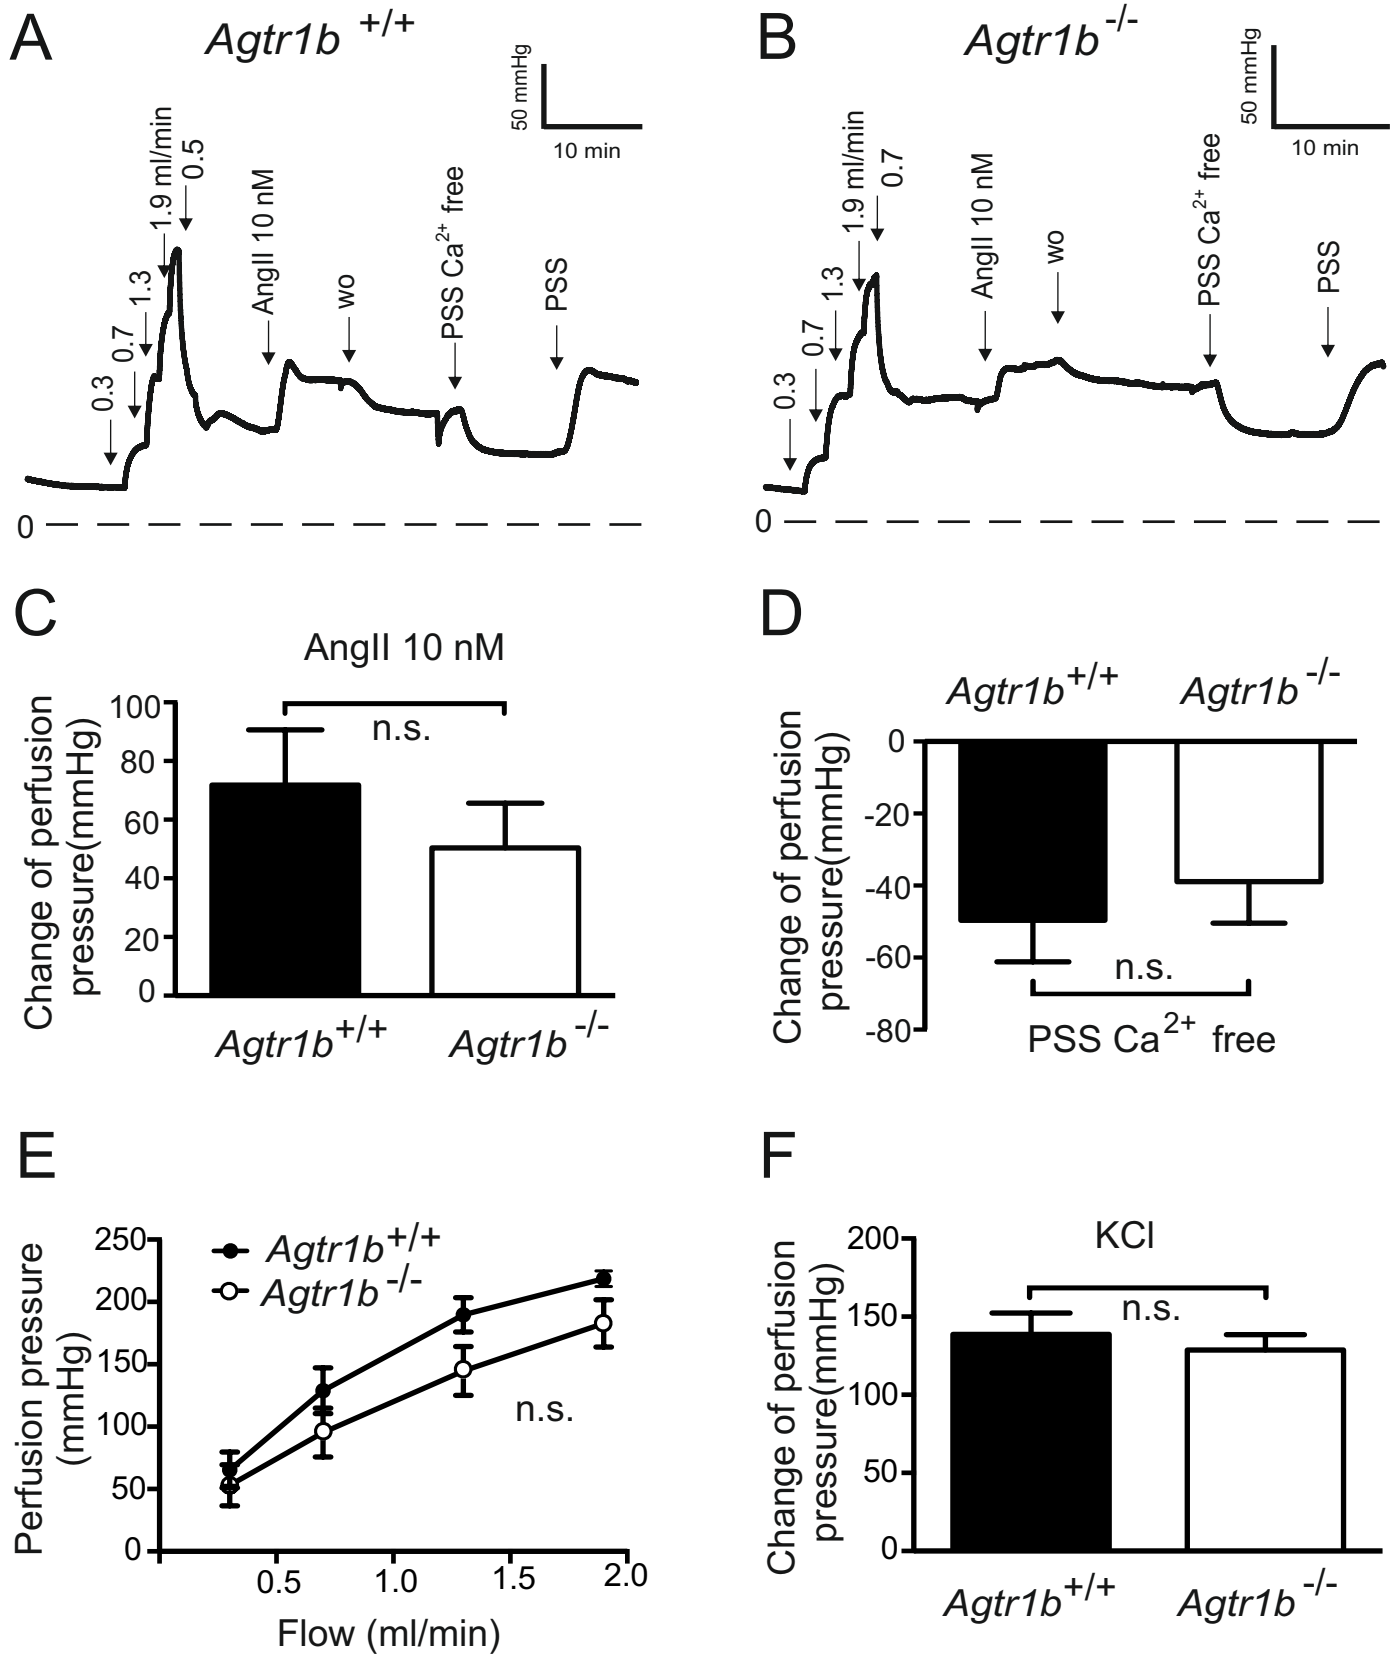

Figure 3

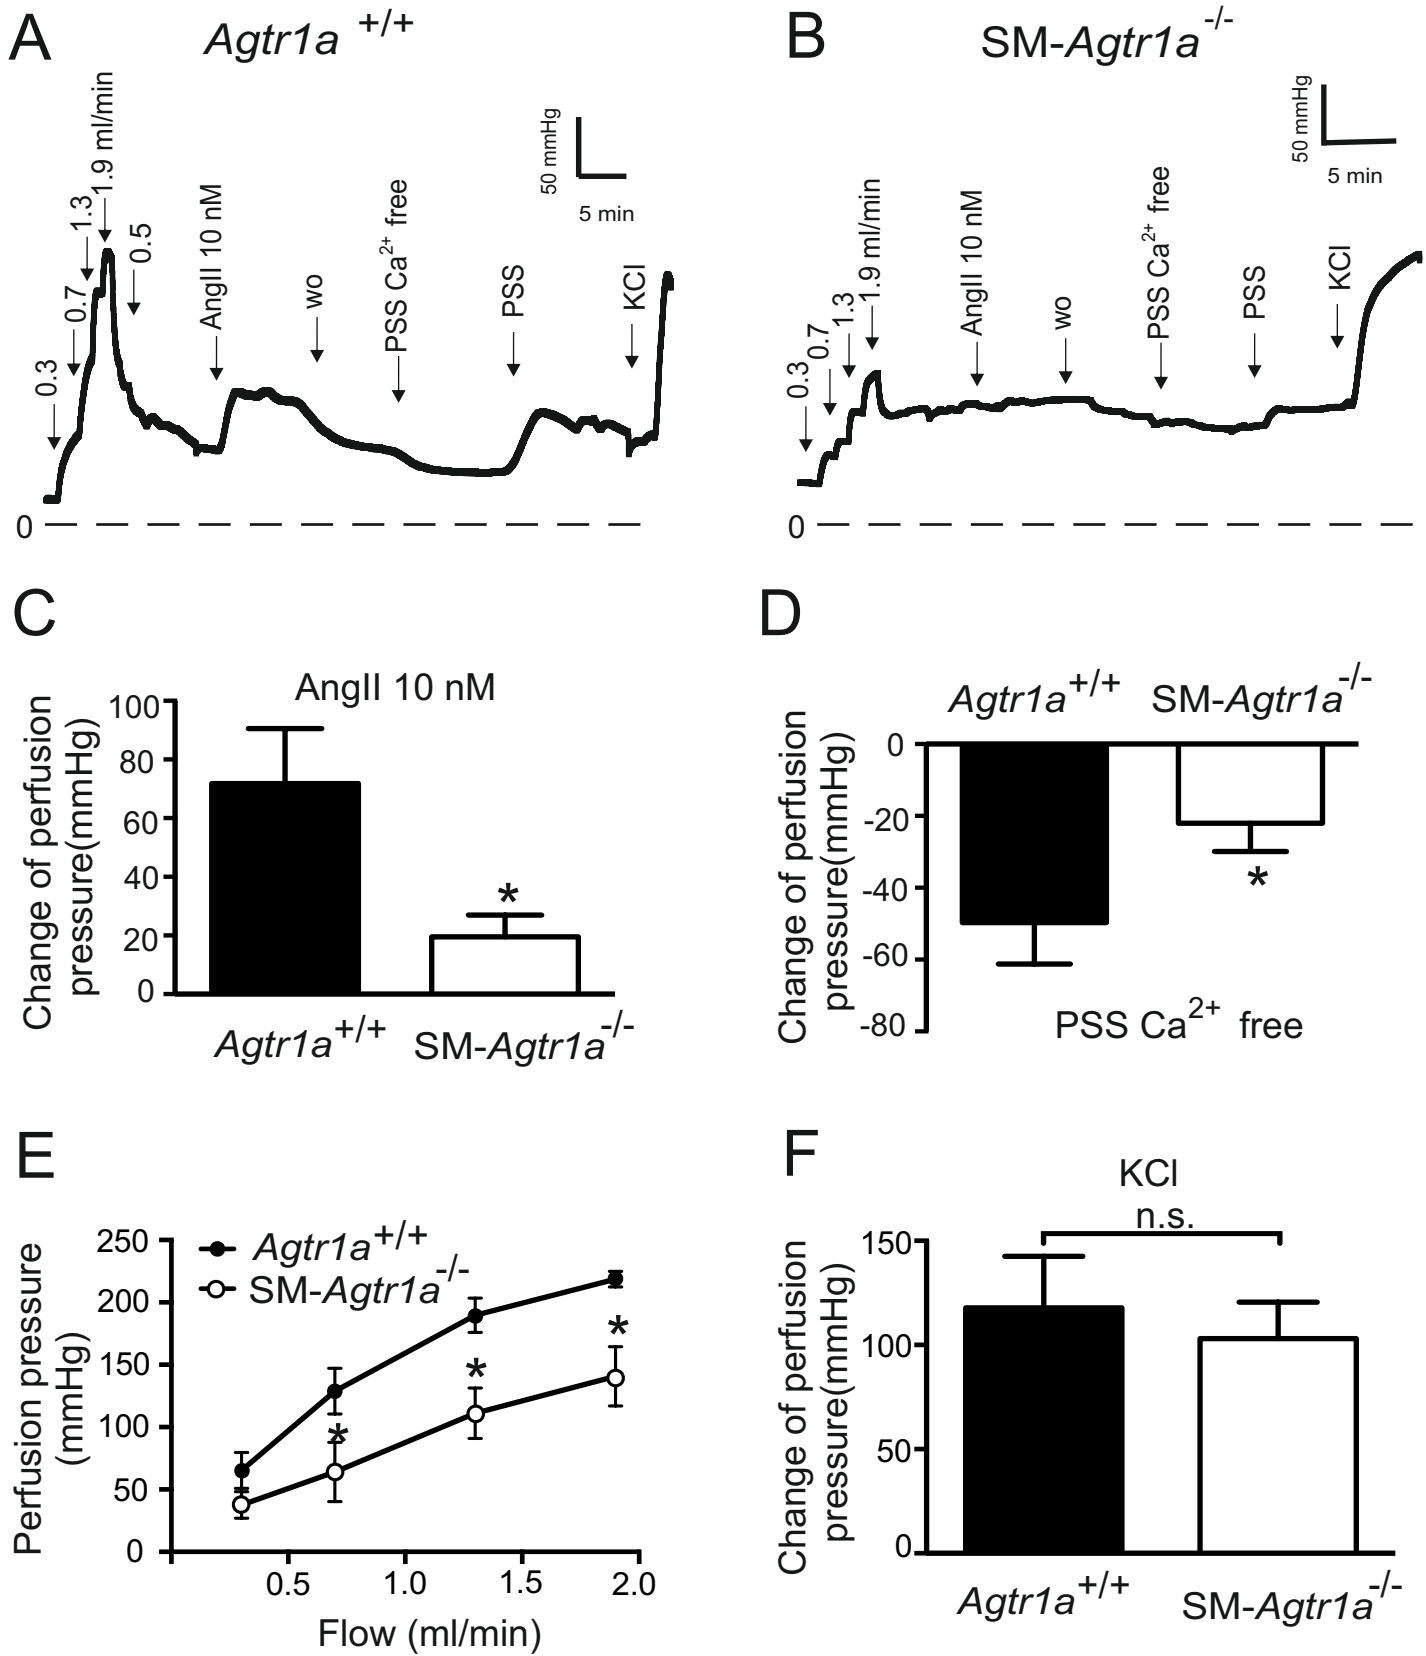

Figure 4

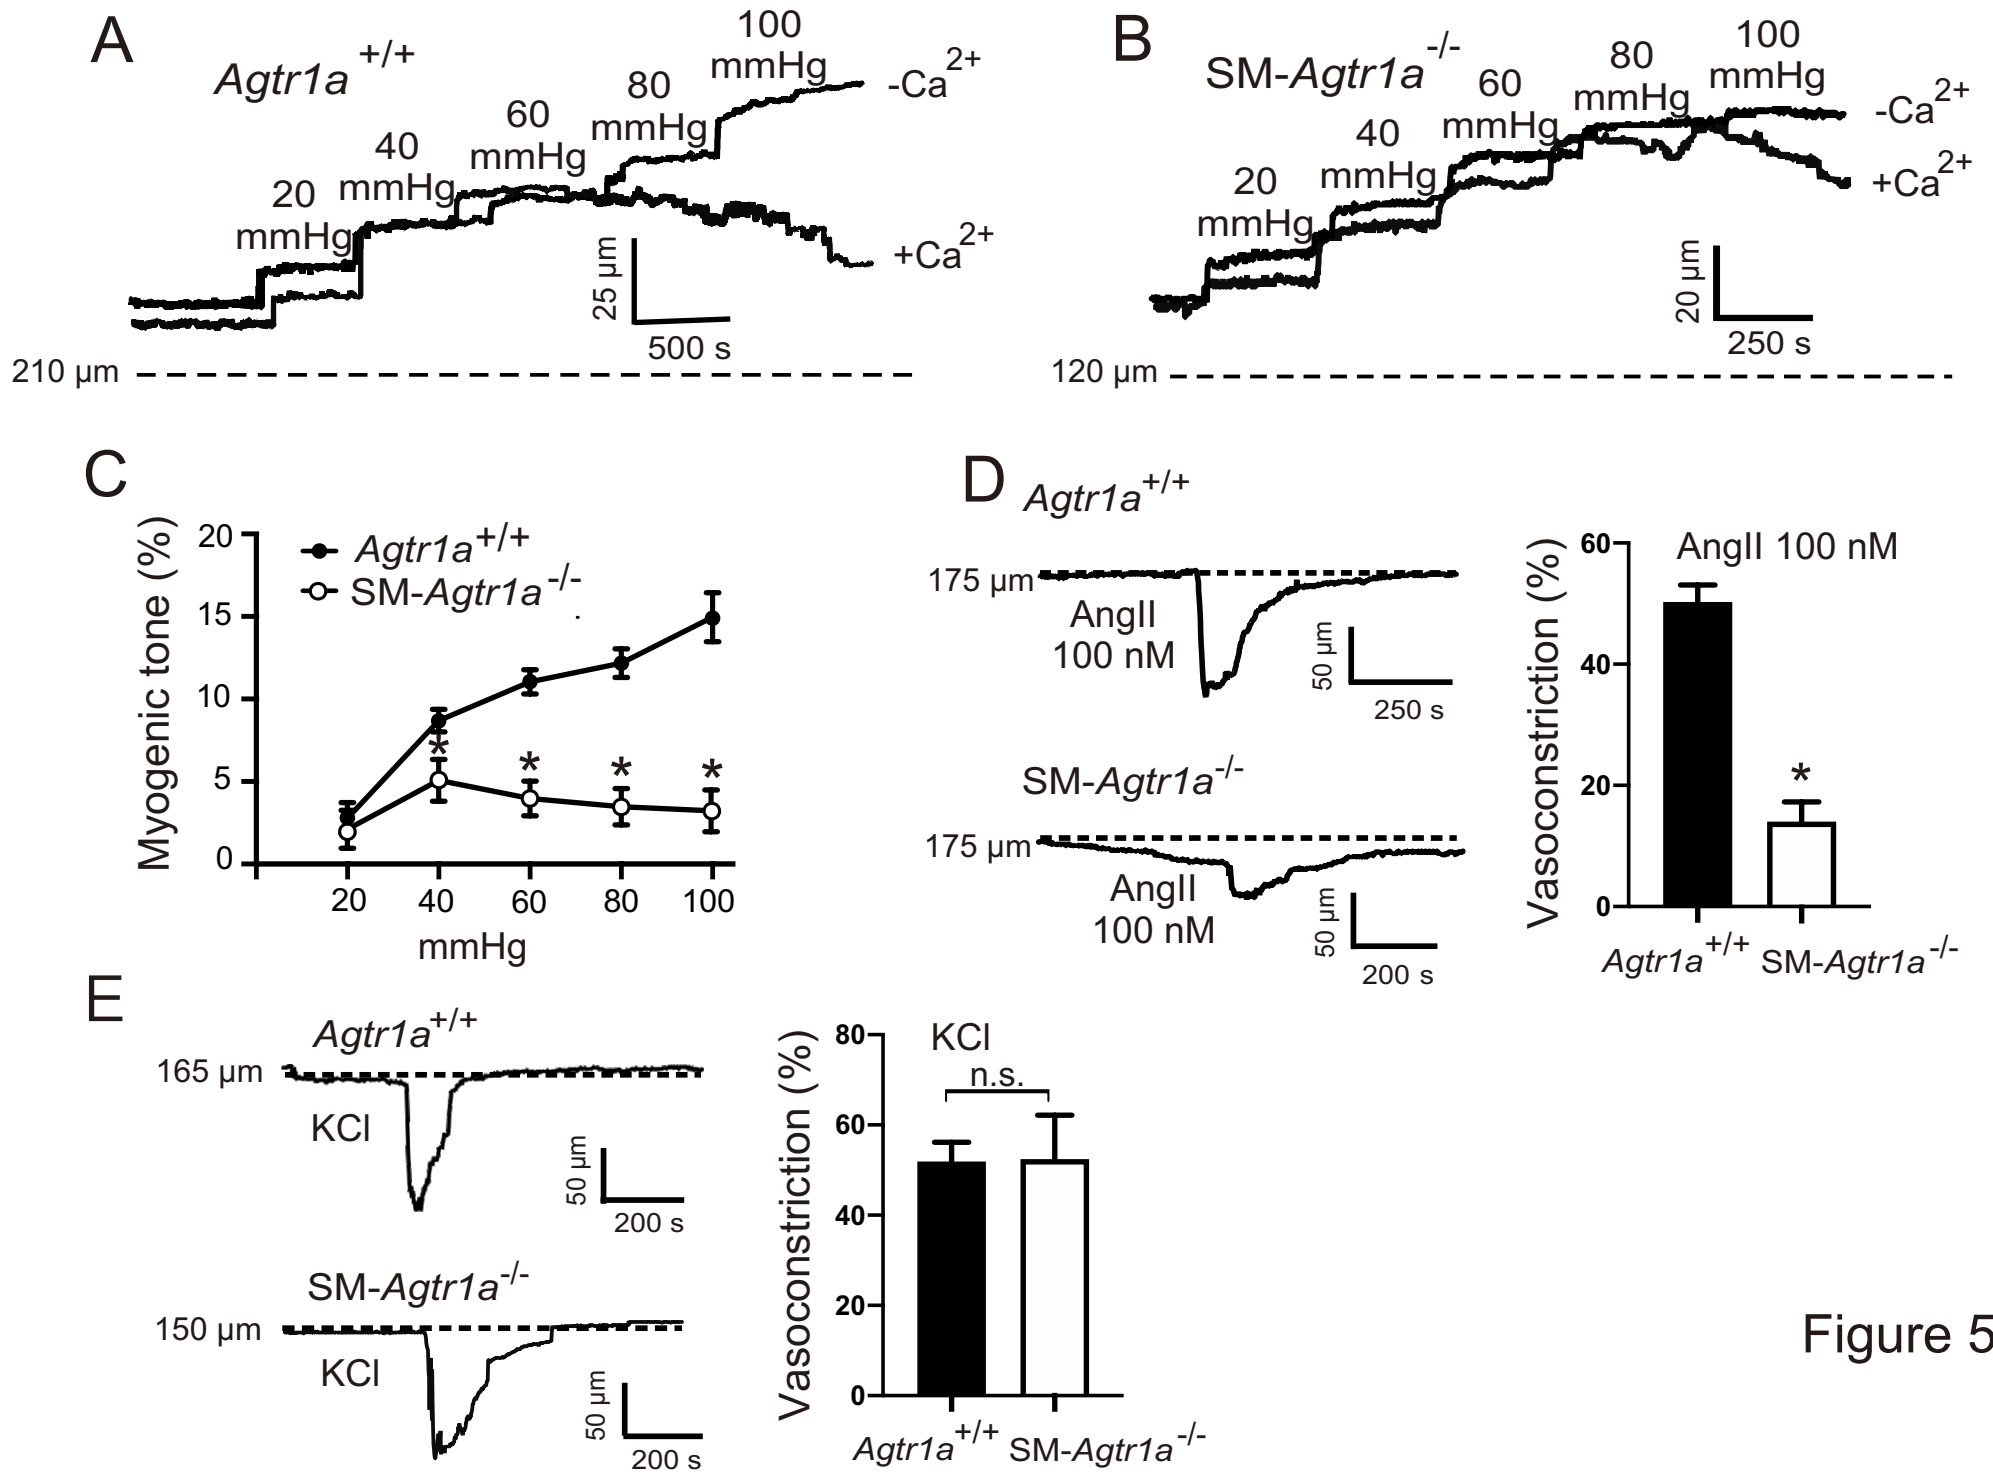

Figure 5

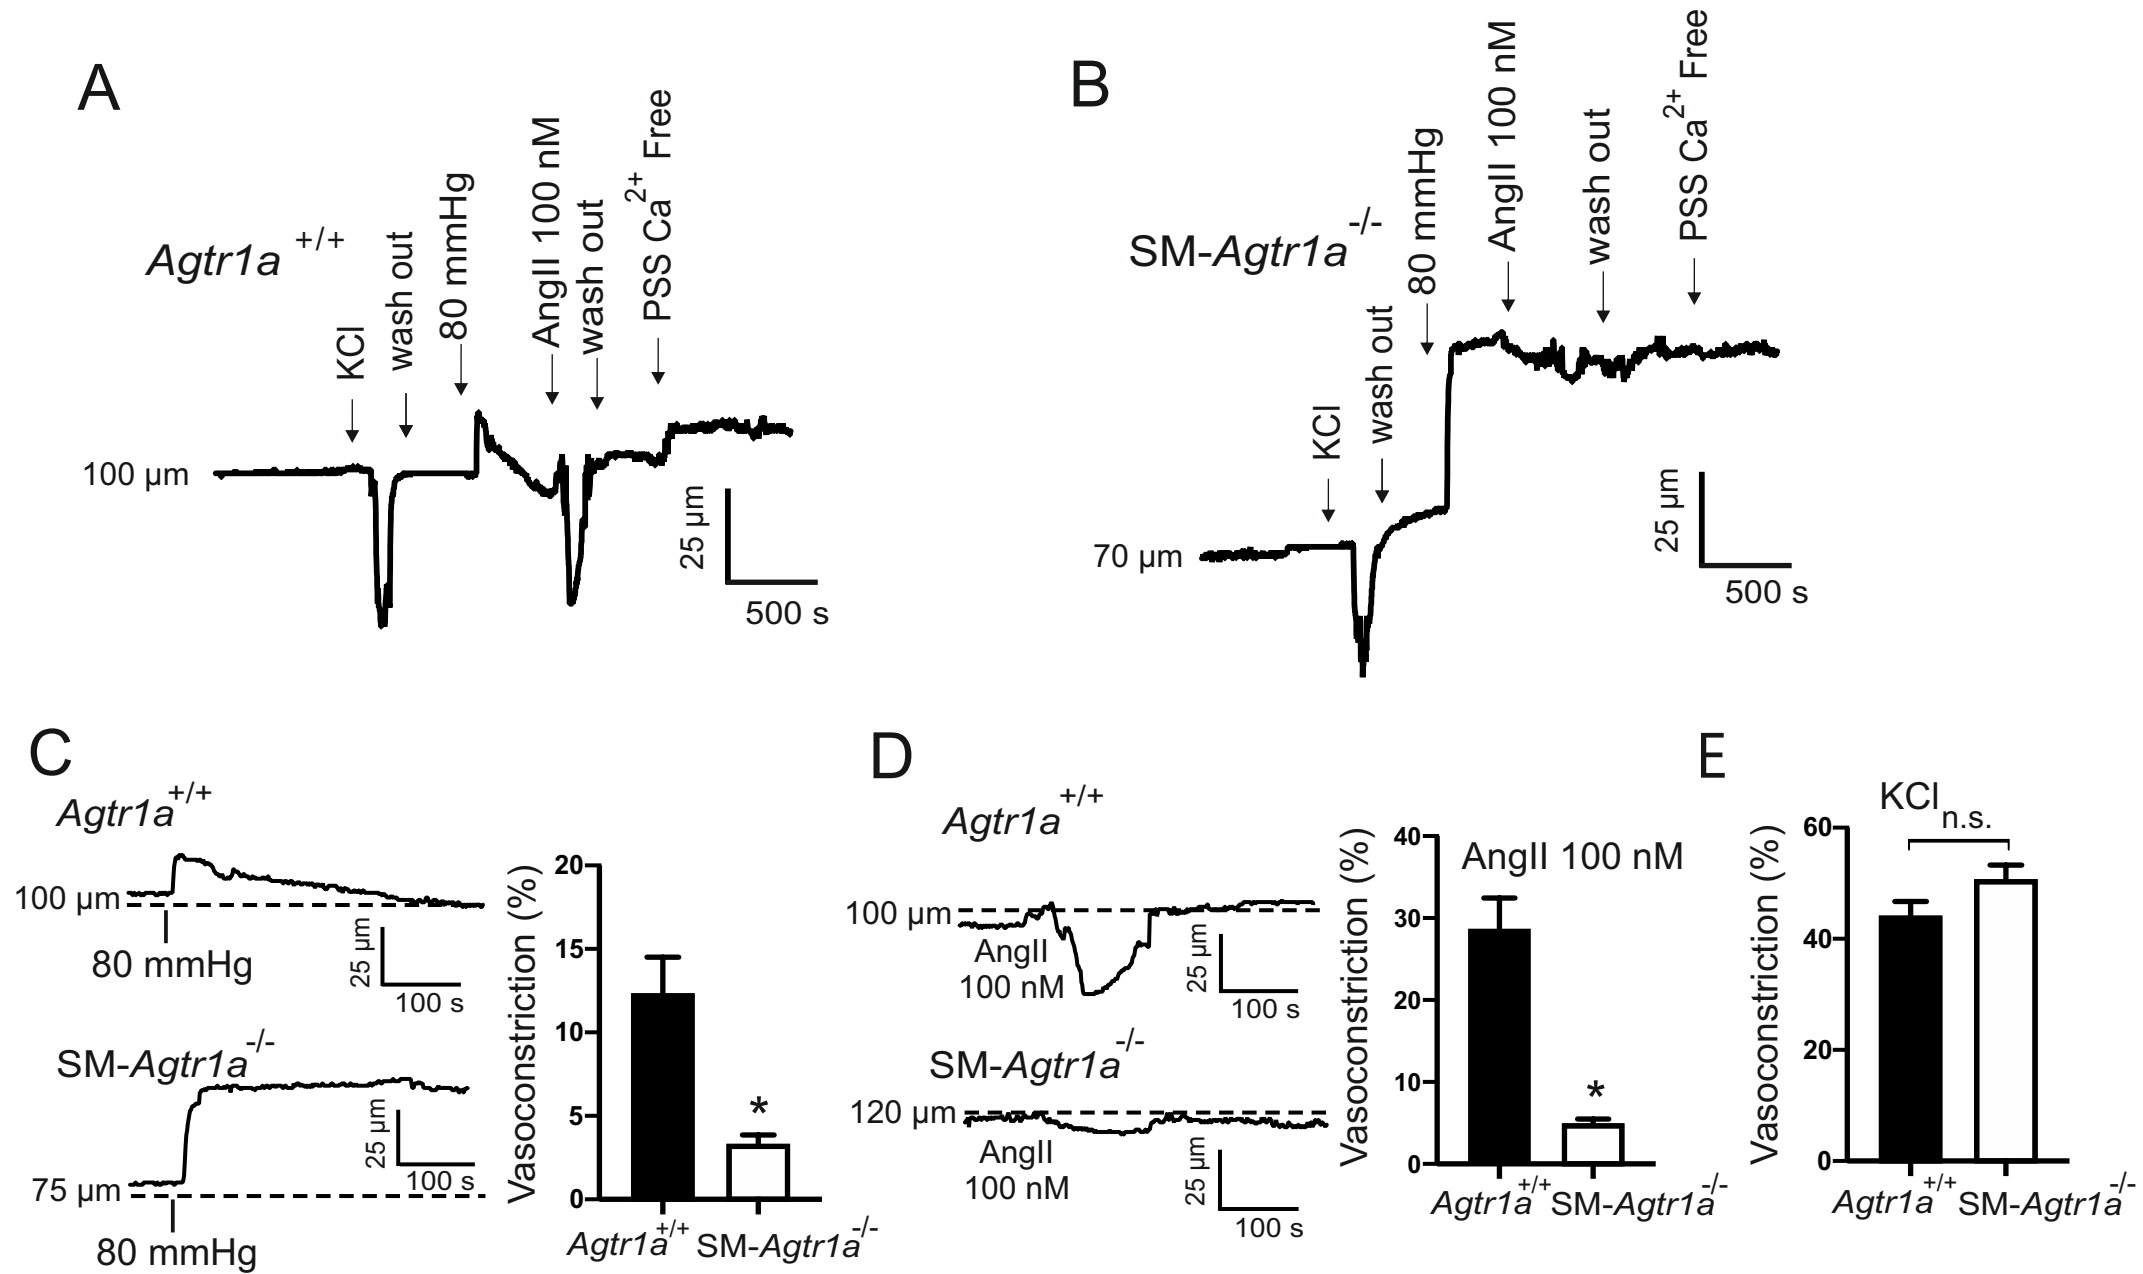

Figure 6

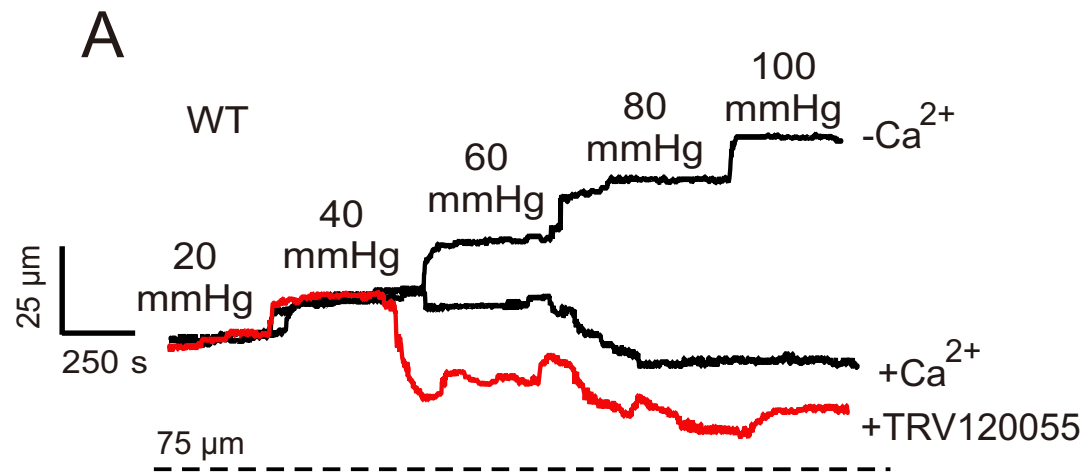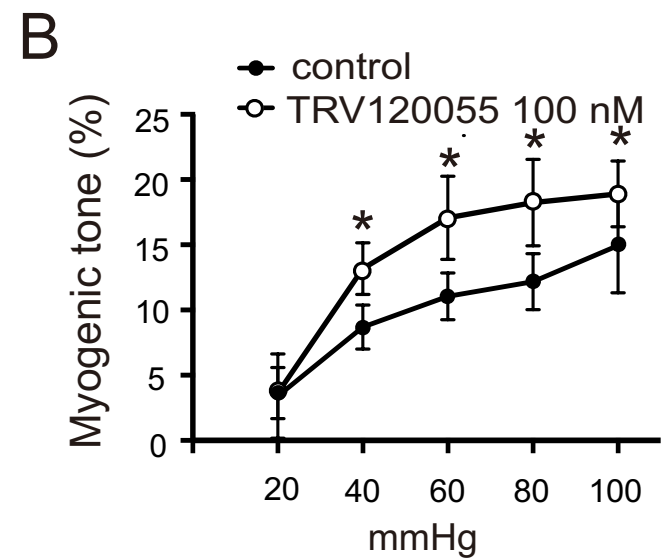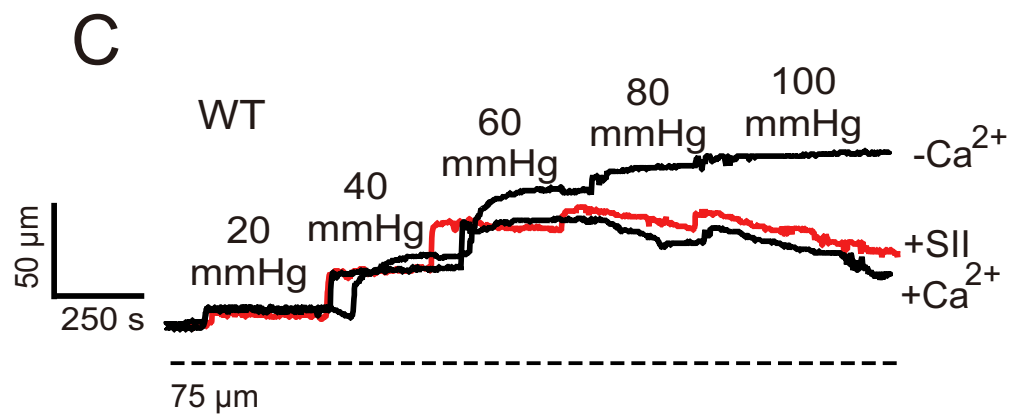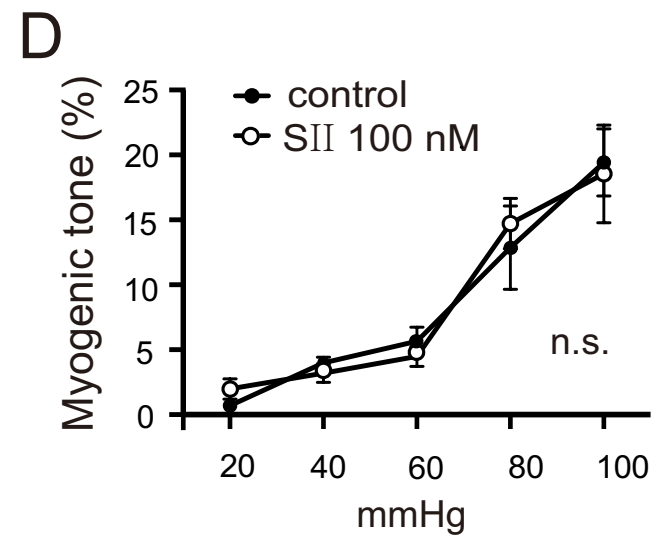

Figure 7



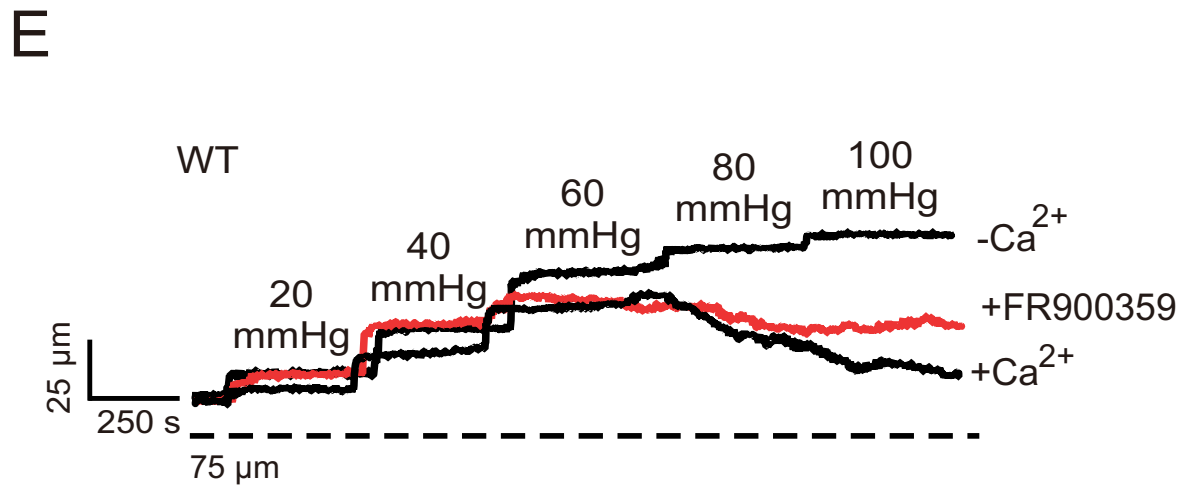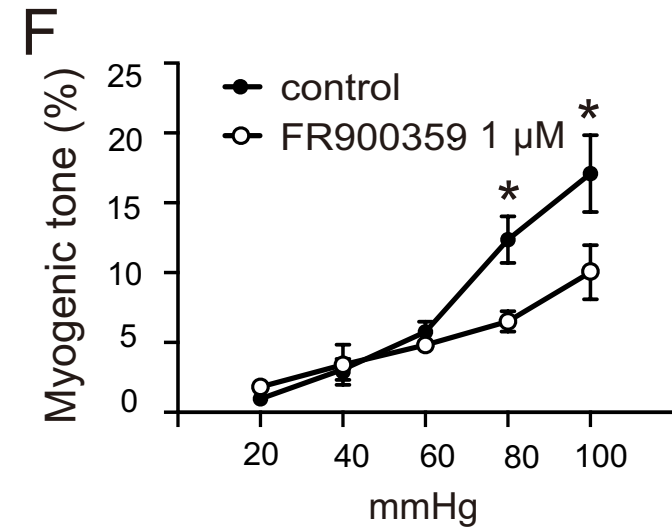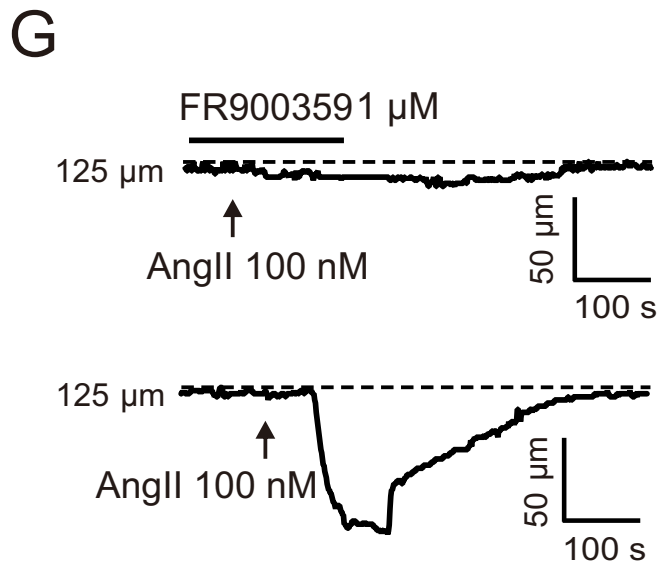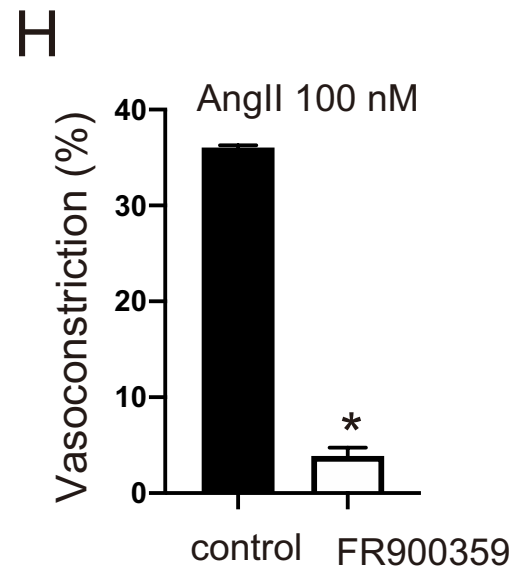

Figure 7

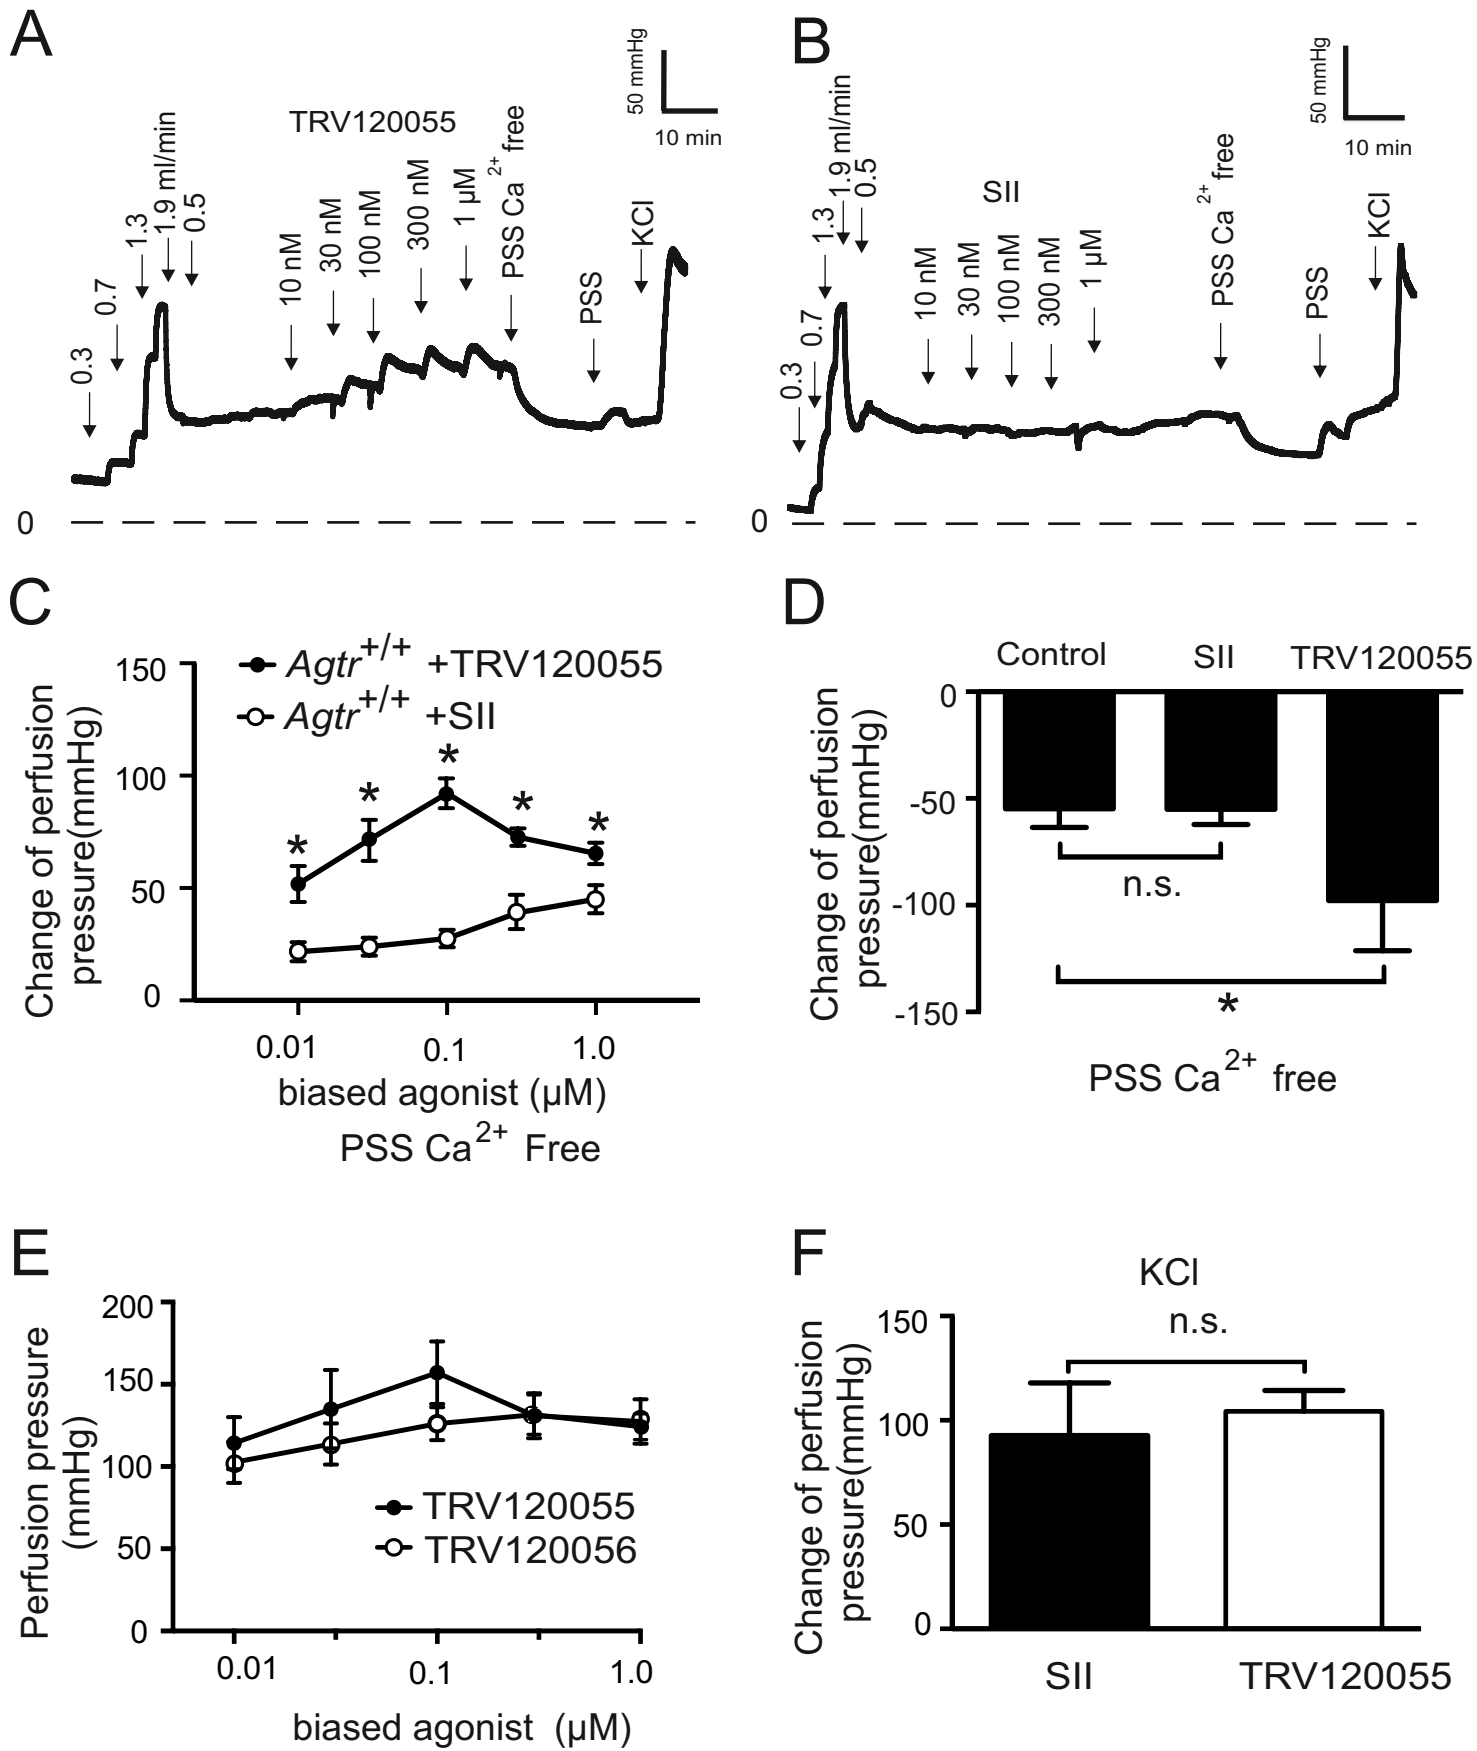

Figure 8

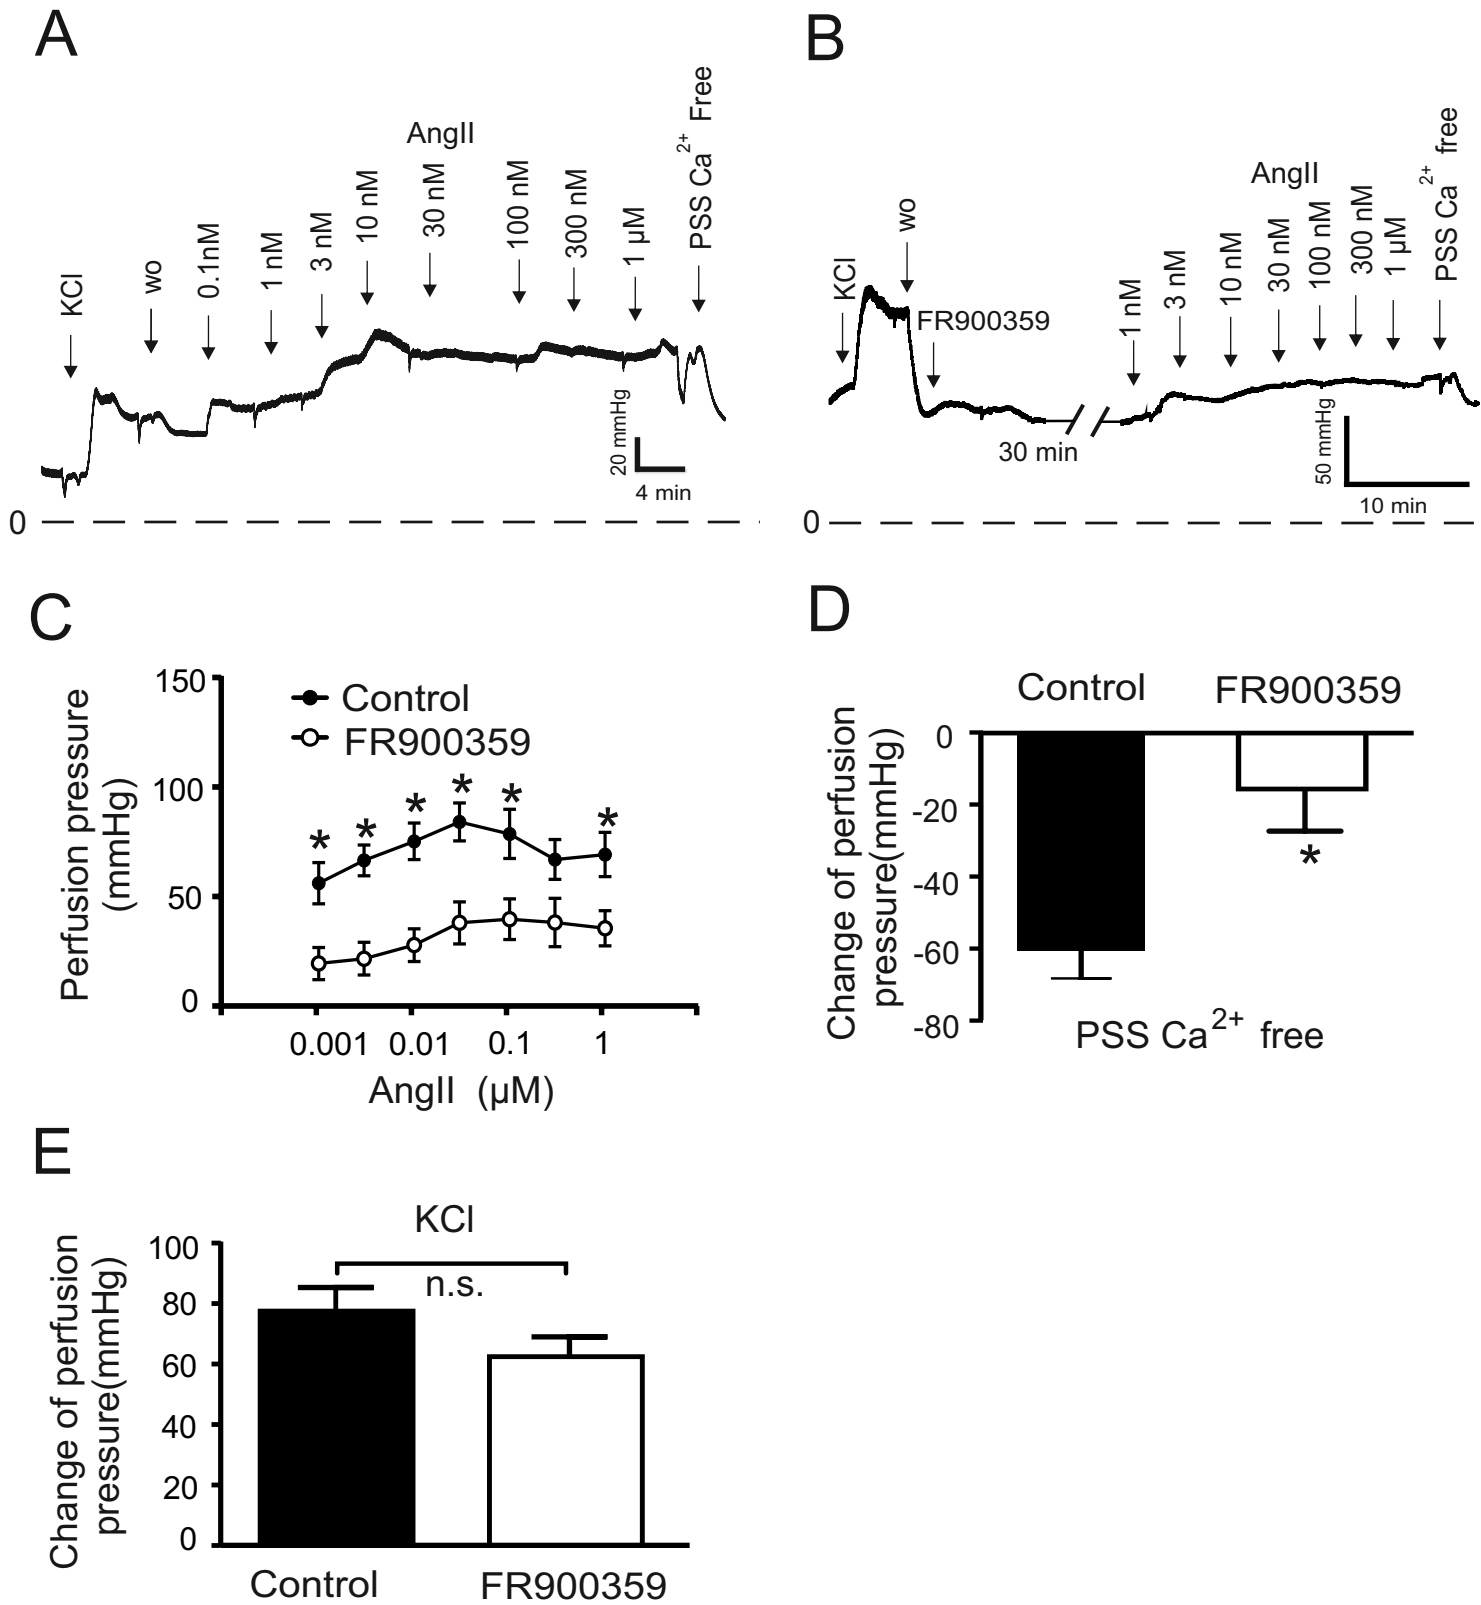

Figure 9

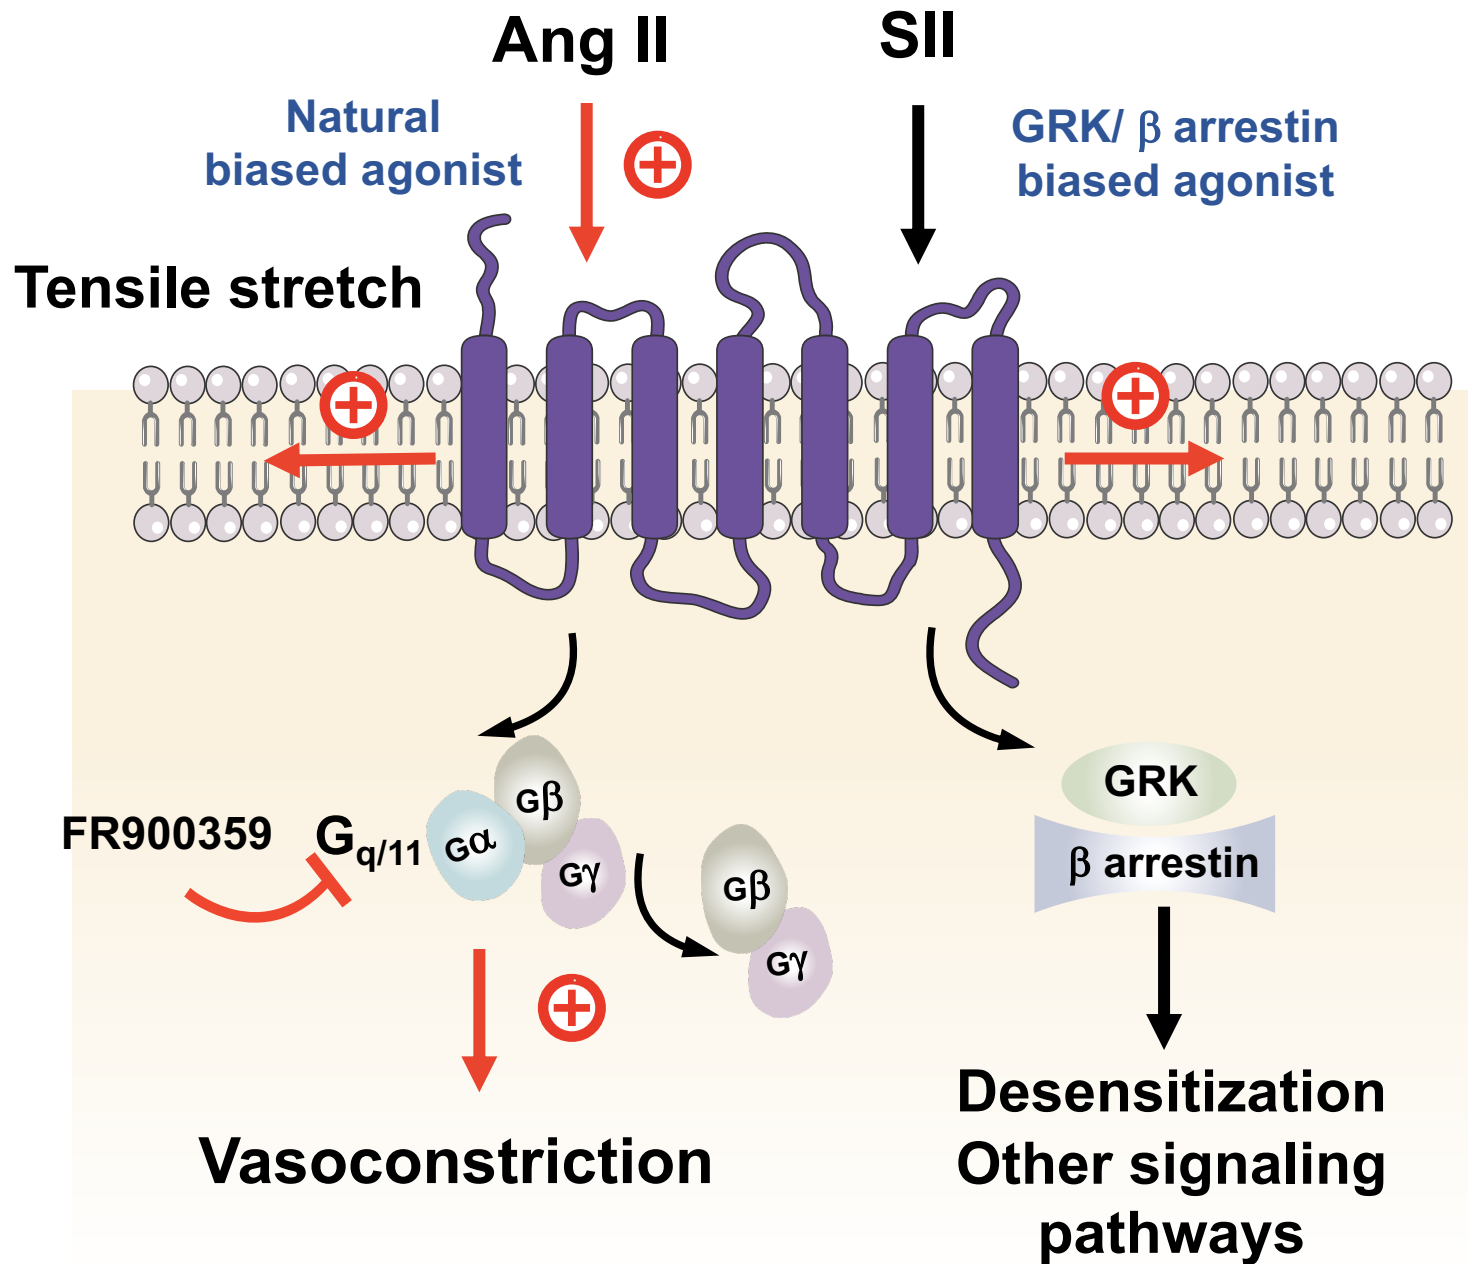

Source: http://biorxiv.org/content/10.1101/2020.09.09.289280v1.full.pdf
